# Supplementary material for: Exploring Factors Affecting Informal Peer Tutoring Process Among Pre-Clinical Medical Students of a Private Medical College
Source: Research Square preprint supplement (doi:10.21203/rs.3.rs-5537207/v1), 2025-05-02
Supplement: Supplementary file 1 [file 059c3cca7c9243b1f1cc301a.docx]

**FOCUS GROUP DISCUSSION – 2**

**Pre-clinical medical students – 2nd year MBBS**

**06 participants**

**13th June 2024**

# Audio file

Voice 022.m4a

# Transcript

**Interviewer**

**Assalamualaikum! can you describe your typical day in a preclinical year of the medical program?**

Speaker 1

Alright, during the pre Preclinic I just in the college times I used to study and after College in Summers I go to swimming and then afterwards I just revise what in a day we we we just learned. And then I I I have a habit to sleep early in the night, in night, and then my day is really short.

Speaker 2

In typical day of the medical program we have, Like my routine is like too much typical. We have to attend lectures [aa…] attend the anatomy labs, anatomy, study anatomy, Physiology, biochemistry. And it's a mix of classes like group study sessions, self studies and we are making our concepts before [aa..] like going to the clinical area and yeah that’s all

Speaker 3

A typical day in my clinical year of medical program consists of me basically attending all my classes going to my sgas, flip classes, skill labs, histo skill labs. It also includes a lot of self studies, which can be a bit annoying at times because during the summers it's really hot and we don't have anywhere to sit. So even if we want to like use that self study time in order to study, we don't usually have the appropriate area or places where we can do so. So that's about it. Thank you.

Speaker 4

A typical day of mine starts right around 6:00 AM when. I woke up. A typical day of mine starts around 6:00 AM and I reach university at 8 and there I attend my lectures from 8:00 AM to 3:00 AM. After reaching at home, I take my lunch and take a small nap after it, I go for sports and or early or any healthy activity. At the end of the day I start studying, then I scroll for some time and go to sleep.

Speaker 5

Typically, in my preclinical year of medical program is that I wake up early in the morning and then we came in the university and we have a lot of lectures sometime in the day is very hectic because of our day. Lectures and sometimes we have a lot of self study which do not we consume because of there is no sitting area or [aa…..] comfortable environment for self study and then as the formative assessment or the exams coming up, then we sit in the library and also[aa..] make a slot and time for the self study and prepare for exam.

Speaker 6

A typical day in my pre clinical starts with taking a lot of lectures and then sgas. We do utilize self studies sometimes before the formative assessments, otherwise we don't really study. But sometimes we do because there is again not any sitting place where we can easily study. So and in summers, it is very difficult. So we utilize self study before formative assessments.

# Audio file

Voice 023.m4a

# Transcript

**Interviewer:**

**How do you explain the role of a student in teaching and learning? For example, how do you think what is What is the role of a student as a teacher?**

Speaker 1

As a teacher, when he when he or she have has to explain or have to explain his peers about something he should be[aaa…] he should have a () a role of student as a teacher is is it should be that the the bonding of the student with his peer is more than a teacher. He can explain better the topics which are which are understood by the teacher and he can better explain the topics and the questions in his in his friend's mind as compared to our teacher because he is more emotionally attached with his with his friend.

Speaker 2

Ma'am, according to me, you not only learn as a student, you share your knowledge with your peers, with your friends, and it reinforce your understandings. Or I think so. It improve, enhance your concepts and it gives you a supportive learning environment.

Speaker 3

I feel that as the role of a student in a group study session is quite profound, because as a student [aa..] when you're learning with your peers [aa..] You're very[aa..] OK, so you're quite close to your friends, so you can teach them better[aa..] You are at a similar similar playing ground or a learning curve with them. So you the concepts are just as new to you as to them and they can better teach you the tactics and the skills being at your level and you can also be quite frank with them because when you're learning with teachers in a class, it's it may be harder to question them. When you study things from the book they're very volatile and you forget them easily but when you do it with friends, you build a deeper understanding It may be harder to speak up when you don't understand something and you just let it go even though you don't have the concept completely grasped yet. But with your friend you can question them however many times you want and the student who is acting as a teacher should always be [aa…] easygoing, they should always be understanding of the other students, their level of learning and [aa..] they should always be easy to talk to. Thank you

Speaker 4

Students play a vital role in teaching process, process. They provide a valuable feedback. Also, peer teaching is more fun across and have and students have same cognition level as that us of us so it's more easier to study with. Questioning is cross questioning is a lot easier help helping us in better learning of the topic.

Speaker 5

Role of a student role of the student in teacher is is good because the bonding between the peer and the friends is much more important. If if we don't understand anything, we can ask again and again to a friend. But if we ask as to the teacher, we become (pause) we become shy and do not ask a question and we we become nervous and our concept are not clear and if we study in a group study and we ask peer as a student, then we questions again and again and we have better concept and that's it.

Speaker 6

So. Teaching role can enhance or leadership skills and also it is easy to learn in a group study because there is no communication barrier. We can easily we can ask open end questions like we normally can't in like interactive lectures or or with teachers.

# Audio file

Voice 024.m4a

# Transcript

**Interviewer**

**So how do you plan and execute a peer tutoring process? Meaning how do you start with it? How do you arrange? How do you manage and how do you decide who is going to be the tutor and who is going to be the tutee?**

Speaker 1

OK. Firstly, we just started the peer tutoring like in the topics which we just didn't understand by the teacher we just settled, we just settled that we will just divide the topics and the half topics will be understand by one friend and the other with the other friend and we just cross communicated the topics. In some topics 1 friend became the teacher and other the tutee and in other topics one became the tutee and other became the friends and that's how we easily just managed.

Interviewer

How do you decide who is going to teach me this topic? If you have a problem, then how will you decide which one of my friend or my peer is going to teach me this topic.

Speaker 1

We just look at the the marks which one get one get in the formatives or the test series which are going on and then we just give large topics to his or her [laughter]

Interviewer

Thank you.

Speaker 2

Ma'am, getting started with the peer tutoring process we have to identify the needs and goals and like find a group or a partner with which you are comfortable. And the next question arranging for me here tutoring. First of all, we have to arrange the initial meeting, determine the location which is comfortable or and the other thing is whether the session will be virtual or personal like face by face and establish a schedule which is meeting with everyone, like everyone can easily approach that time.

**Interviewer**

**Do with your peers. You do the virtual sessions also.**

Speaker 2

Yeah, at the corona time, we do, yes. And. The next question deciding roles of tutor and duties. Basically it depends upon that. First of all, we have to determine our we have to determine our weaknesses or like if we are weak weakens in one subject and the other one is like and be in and check the confidence. Like if someone is confident more than me, so I will prefer or to like he will give this session or like take this session.

Speaker 3

OK, so we usually get started with peer tutoring when we feel the need that there is a topic that we quite didn't understand from the teacher during the lecture or a skill lab. And when we know that there is not enough time to study it individually from the book or from like online video tutorials. So we arrange a group. Usually it's my friends that I do peer tutoring with and [aa..] I arranged my informal peer tutoring sessions by firstly locating an area where which which is comfortable for the peer tutoring session[aa..] we decide a time because all of my friends are in different batches, so I usually have to rely on online sessions [aa..]at home after college.[aa..] I manage my time to conduct peer tutoring sessions by (pause) By pre deciding how much time it would take for [aa..] a certain topic to get done[aa..] beforehand, and we decide on [aa..] who's going to be the tutor and tutee by asking around who understood the topic the best from the teacher and who has a better understanding of it. And who can [aaa…] clearly make us understand the topic, because some students they understand better by themselves, but they do not have the skill sets to make others understand just as well. So we also have to look at that aspect aspect. Thank you.

Speaker 4

First of all, we check the availability of every peer tutor and afterward everyone is assigned his specific topic which he explains to the group after thoroughly studying it. Mostly every peer self volunteers what topic he wants to teach based on his understanding.

Speaker 5

So I get started peer tutoring when we have an exam or a formative system assessment because we have very a short time slot and we have to cover very large syllabus. So [aa...] so we arrange our schedule due according to the timetable. We made a timetable and then we follow it. Also I manage time according to first we look at the timetable. If we have a self study then we study in the college, otherwise we make a timetable and. If we have a query or any misunderstanding, then we have to ask in WhatsApp group through pictures and through messages and through voice notes. And if my friend is a better understanding in anatomy, so she teach me anatomy and if I have a better understanding in Biochem or Physio, then I teach her other subject.

Speaker 6

I do peer tutoring more often because what motivates me is my peer is studying. So that motivates me to study more and we arrange because we are in different batches, so we normally do group studies through virtual communication through maybe voice calls or whatsApp and then we decide the roles on tutor and tutee by if one friend is good and she has a better understanding of that topic and I cannot understand that, then she will teach me that and vice versa if I cannot.

# Audio file

[Voice 025.m4a](https://onedrive.live.com?cid=c177b401a2934353&id=C177B401A2934353!se76b3c7dc500438589f100ac75d16a1e)

# [Transcript](https://onedrive.live.com?cid=c177b401a2934353&id=C177B401A2934353!se76b3c7dc500438589f100ac75d16a1e)

**[Interviewer](https://onedrive.live.com?cid=c177b401a2934353&id=C177B401A2934353!se76b3c7dc500438589f100ac75d16a1e)**

**[So what factors affect your decision to join or participate in a group of peer tutoring?](https://onedrive.live.com?cid=c177b401a2934353&id=C177B401A2934353!se76b3c7dc500438589f100ac75d16a1e)**

[Speaker 1: The factors which help me that is that there is no communication barrier between a friend, between the friends and we can easily understand we can easily ask again and again to explain the topic which which we can't understand. [aa..]](https://onedrive.live.com?cid=c177b401a2934353&id=C177B401A2934353!se76b3c7dc500438589f100ac75d16a1e) [I am a tutee, and [aaa….] my friend is a tutor because she has a better way of explanation, so [aa…] that is important to me. Secondly [aa..] according to me there is a more emotional attachment and a friend can easily [aa..] know [aa..] about the the percent of a topic understood by her friend, and she can easily [aaa…] give her a grip on that topic.](https://onedrive.live.com?cid=c177b401a2934353&id=C177B401A2934353!se76b3c7dc500438589f100ac75d16a1e)

[Speaker 2](https://onedrive.live.com?cid=c177b401a2934353&id=C177B401A2934353!se76b3c7dc500438589f100ac75d16a1e)

[[aa..] What’s the first question.](https://onedrive.live.com?cid=c177b401a2934353&id=C177B401A2934353!se76b3c7dc500438589f100ac75d16a1e)

**[Interviewer](https://onedrive.live.com?cid=c177b401a2934353&id=C177B401A2934353!se76b3c7dc500438589f100ac75d16a1e)**

**[What factors affect your decision that you you want to participate in a peer tutoring process?](https://onedrive.live.com?cid=c177b401a2934353&id=C177B401A2934353!se76b3c7dc500438589f100ac75d16a1e)**

[Speaker 2](https://onedrive.live.com?cid=c177b401a2934353&id=C177B401A2934353!se76b3c7dc500438589f100ac75d16a1e)

[In participating the peer tutoring process, I think so in achieving the goal and I am facing the challenges challenges. So like in the group study, we covered many concepts in a very little times and all your friends helps you to solve your challenges or like this and yeah, next.](https://onedrive.live.com?cid=c177b401a2934353&id=C177B401A2934353!se76b3c7dc500438589f100ac75d16a1e)

[Speaker 3](https://onedrive.live.com?cid=c177b401a2934353&id=C177B401A2934353!se76b3c7dc500438589f100ac75d16a1e)

[[aa…]I believe that peer tutoring is a very important[aa..] part of our learning process because [aa..]usually it takes a shorter time. [aa..]The concepts are more fun when you learn it with your friends. [aa..]There is a deeper understanding [aa..]you remember them for quite some time even after the exams are over and usually when you study things from the book they're they're very volatile and you forget them easily but when you do it with friends, you build a deeper understanding. [aaa…] also [aaa…] the the group that you're joining, it also affects whether you want to join a peer tutoring group or not, because if the people in the group are already your friends, you have a good connection with them. I feel like it's easier to join a group that way. Thank you.](https://onedrive.live.com?cid=c177b401a2934353&id=C177B401A2934353!se76b3c7dc500438589f100ac75d16a1e)

[Speaker 4](https://onedrive.live.com?cid=c177b401a2934353&id=C177B401A2934353!se76b3c7dc500438589f100ac75d16a1e)

[[aa..] Factors that affect my decision are, first of all my friends, if they are in the group or not. Also my available timings and also my comfort level if I am comfortable then I am more prone to joining them. Also self evaluate evaluating if that is actually needed or not. For example if I already know know Physio I won't be participating in Physio tutoring. Instead, I'll be joining the anatomy group instead.](https://onedrive.live.com?cid=c177b401a2934353&id=C177B401A2934353!se76b3c7dc500438589f100ac75d16a1e)

[Speaker 5](https://onedrive.live.com?cid=c177b401a2934353&id=C177B401A2934353!se76b3c7dc500438589f100ac75d16a1e)

[Factor affect my decision to join and participate in Group study is that my that syllabuses are huge and we have to cover in a short time. So [aa..] we divide as labels in a group study. And we have to cover [aa..]in a short period. Also my friend has a very good tutoring style. So I so. So I understand it more clearly than from reading from the book because it's very volatile and we forget easily so.](https://onedrive.live.com?cid=c177b401a2934353&id=C177B401A2934353!se76b3c7dc500438589f100ac75d16a1e)

[Interviewer](https://onedrive.live.com?cid=c177b401a2934353&id=C177B401A2934353!se76b3c7dc500438589f100ac75d16a1e)

[Are you a tutor or a tutee?](https://onedrive.live.com?cid=c177b401a2934353&id=C177B401A2934353!se76b3c7dc500438589f100ac75d16a1e)

[Speaker 5](https://onedrive.live.com?cid=c177b401a2934353&id=C177B401A2934353!se76b3c7dc500438589f100ac75d16a1e)

[I am a tutee and my friend is a tutor because she has a better explanation.](https://onedrive.live.com?cid=c177b401a2934353&id=C177B401A2934353!se76b3c7dc500438589f100ac75d16a1e)

[Speaker 6](https://onedrive.live.com?cid=c177b401a2934353&id=C177B401A2934353!se76b3c7dc500438589f100ac75d16a1e)

[I like to participate in peer tutoring more often because [aa..] because it helps me in much and we all of my friends, we all have the same study style so it makes it really easier like one can make flow charts or highlight the important points and then share with us. Then it will take take us less time to go through the topic instead of reading it all. And that really helps us in formative assessments and for studying for exams that are like.](https://onedrive.live.com?cid=c177b401a2934353&id=C177B401A2934353!se76b3c7dc500438589f100ac75d16a1e)

[Interviewer](https://onedrive.live.com?cid=c177b401a2934353&id=C177B401A2934353!se76b3c7dc500438589f100ac75d16a1e)

[Are you a tutor or a tutee?](https://onedrive.live.com?cid=c177b401a2934353&id=C177B401A2934353!se76b3c7dc500438589f100ac75d16a1e)

[Speaker 6](https://onedrive.live.com?cid=c177b401a2934353&id=C177B401A2934353!se76b3c7dc500438589f100ac75d16a1e)

[I change roles like we often change roles.](https://onedrive.live.com?cid=c177b401a2934353&id=C177B401A2934353!se76b3c7dc500438589f100ac75d16a1e)

# Audio file

Voice 026.m4a

# Transcript

**Interviewer**

**Now, what factors affect your decision to leave a group?**

Speaker 1

[aaa…] Actually, [aaa..] during sometimes during group studies, we just indulge in other thoughts and we start gossiping which waste a lot of time and [aa..] we just think [aa..] we can study more accurately sometimes when we are alone, because sometimes group studying just waste our time because we can't focus on that topic as much. [aa…] According to me, I can focus separately because we we just start gossiping and talking about it topics.

Speaker 2

The factors that affect my decision to leave the group are ineffective tutoring, like [aaa…] the sessions do not meet academic needs, and the conflicts between the group members and [aa..] the like [aa..] in the tutor is not expertise like he have no knowledge too much and the main is like location, sometime it is very inconvenient like the locations are too far so it is very inconvenient to reach there.

Speaker 3

The factors that affect my decision to leave a group usually include inavailability of time. [aa..] Maybe I'm not [aa..] available for that time slot that the other peers have decided. [aa..] Maybe I do not understand as well from the tutor. Maybe [aa..] if I'm assigned a topic I didn't have time to prepare. Or [aa..] I do not have that great of understanding. Maybe the area which they've selected the location is not that great and I'm not comfortable there. Maybe the other members of the group are I'm not comfortable with them in their presence. Maybe I can understand the topic better on my own. Some [aa..] topics they are like based on rot learning more often, so even if we do a group study session, there's no benefit in that. So I'd rather learn it on my own. Thank you.

Speaker 4

First of all.

# Audio file

[Voice 027.m4a](https://onedrive.live.com?cid=c177b401a2934353&id=C177B401A2934353!s4d66d4affc2b42fdb3844a9613e9637a)

# [Transcript](https://onedrive.live.com?cid=c177b401a2934353&id=C177B401A2934353!s4d66d4affc2b42fdb3844a9613e9637a)

[Speaker 4](https://onedrive.live.com?cid=c177b401a2934353&id=C177B401A2934353!s4d66d4affc2b42fdb3844a9613e9637a)

[First of all I check my schedule if I'm available then I will be going with them. Also the team I'm team and my comfort level. If I'm being too uncomfortable I will leave the group. Also the pace of the group is going with is an important factor. If they are too slow I won't be participating in the group oftenly.](https://onedrive.live.com?cid=c177b401a2934353&id=C177B401A2934353!s4d66d4affc2b42fdb3844a9613e9637a)

[Speaker 5](https://onedrive.live.com?cid=c177b401a2934353&id=C177B401A2934353!s4d66d4affc2b42fdb3844a9613e9637a)

[Affected affect my decision to leave the group is the mismatch learning style and the conflict conflicting schedule among my peers and also before we have to execute exec the? Self Study group we have to open communication between the peers. So we address the problems or conflicts between us.](https://onedrive.live.com?cid=c177b401a2934353&id=C177B401A2934353!s4d66d4affc2b42fdb3844a9613e9637a)

[Speaker 6](https://onedrive.live.com?cid=c177b401a2934353&id=C177B401A2934353!s4d66d4affc2b42fdb3844a9613e9637a)

[So to it, I can leave a peer tutoring group when there are interpersonal issues going on between us or there it can be that one person is learning way too faster and my pace is slower because of some issues. Then I will not contribute in that. Tutoring and I think it is more important to prioritize your own well-being and if you want to do the peer tutoring sessions or not.](https://onedrive.live.com?cid=c177b401a2934353&id=C177B401A2934353!s4d66d4affc2b42fdb3844a9613e9637a)

# Audio file

[Voice 028.m4a](https://onedrive.live.com?cid=c177b401a2934353&id=C177B401A2934353!sff036d7e2edb4d9aba5ab48c7fdcfb73)

# [Transcript](https://onedrive.live.com?cid=c177b401a2934353&id=C177B401A2934353!sff036d7e2edb4d9aba5ab48c7fdcfb73)

**[Interviewer](https://onedrive.live.com?cid=c177b401a2934353&id=C177B401A2934353!sff036d7e2edb4d9aba5ab48c7fdcfb73)**

**[Besides academic learning, what additional advantage advantage have you obtained as a tutor or a duty through informal tutoring sessions?](https://onedrive.live.com?cid=c177b401a2934353&id=C177B401A2934353!sff036d7e2edb4d9aba5ab48c7fdcfb73)**

[Speaker 1](https://onedrive.live.com?cid=c177b401a2934353&id=C177B401A2934353!sff036d7e2edb4d9aba5ab48c7fdcfb73)

[During informal tutoring sessions, I just learned time management communication skills. [aa..] Besides, I also learned how to explain some one the topics which she or he has a has a problem with him.[aa..] also I just learned about that, how we can easily communicate through a flow charts and instead of and pictures instead of just learning the topics and go through and go through the words 1 by 1.](https://onedrive.live.com?cid=c177b401a2934353&id=C177B401A2934353!sff036d7e2edb4d9aba5ab48c7fdcfb73)

[Speaker 2](https://onedrive.live.com?cid=c177b401a2934353&id=C177B401A2934353!sff036d7e2edb4d9aba5ab48c7fdcfb73)

[[aa..]Beside academic learning, it gives many advantages like as she told [aa…] communication skills. It improve our communication skills, increase our confidence, [aa..] build relationship between the tutor and tutees and deeper understanding of the concepts, enhanced leadership skills - The major thing.](https://onedrive.live.com?cid=c177b401a2934353&id=C177B401A2934353!sff036d7e2edb4d9aba5ab48c7fdcfb73)

[Speaker 3](https://onedrive.live.com?cid=c177b401a2934353&id=C177B401A2934353!sff036d7e2edb4d9aba5ab48c7fdcfb73)

[[aa..]There are many advantages which can be obtained as a tutor tutee in an informal tutoring session.[aaa…] such as, building the confidence to speak in a public environment, better public speaking skills, conversational skills, leadership qualities, [aa..] learning how to perform as a team,[aa..] learning how to resolve conflicts in a group, learning how to talk out things or[aa..] build more patience. That's about it. Thank you.](https://onedrive.live.com?cid=c177b401a2934353&id=C177B401A2934353!sff036d7e2edb4d9aba5ab48c7fdcfb73)

[Speaker 4](https://onedrive.live.com?cid=c177b401a2934353&id=C177B401A2934353!sff036d7e2edb4d9aba5ab48c7fdcfb73)

[[aa..] Besides the academic learning, there are many advantages to it. First of all, it helps me building connection and networking skills. It also polishing my public skipping and speaking and communication skills as well.](https://onedrive.live.com?cid=c177b401a2934353&id=C177B401A2934353!sff036d7e2edb4d9aba5ab48c7fdcfb73)

[Speaker 5](https://onedrive.live.com?cid=c177b401a2934353&id=C177B401A2934353!sff036d7e2edb4d9aba5ab48c7fdcfb73)

[[aa..] As a tutor, I gained communication skills and also [aa..] confidence and as a tutee, we gain critical thinking and and learn from our peers. And also we made a bond between the classmates.](https://onedrive.live.com?cid=c177b401a2934353&id=C177B401A2934353!sff036d7e2edb4d9aba5ab48c7fdcfb73)

[Speaker 6](https://onedrive.live.com?cid=c177b401a2934353&id=C177B401A2934353!sff036d7e2edb4d9aba5ab48c7fdcfb73)

[Apart from academic learning, peer tutoring can help us in building or as a tutor. It can help us in building our leadership skills and communication skills and also it can strengthen our concepts, because if one doesn't understand, I have to do it, explain it in another concept, so that will. Strengthen my own concepts and as in tutee, I can do critical thinking and Maybe and learn from things.](https://onedrive.live.com?cid=c177b401a2934353&id=C177B401A2934353!sff036d7e2edb4d9aba5ab48c7fdcfb73)

# Audio file

[Voice 029.m4a](https://onedrive.live.com?cid=c177b401a2934353&id=C177B401A2934353!saf4d10c1d8f445da81d391d51f40f2f7)

# [Transcript](https://onedrive.live.com?cid=c177b401a2934353&id=C177B401A2934353!saf4d10c1d8f445da81d391d51f40f2f7)

**[Interviewer](https://onedrive.live.com?cid=c177b401a2934353&id=C177B401A2934353!saf4d10c1d8f445da81d391d51f40f2f7)**

**[What challenges have you faced as a tutor or a tutor during the informal peer tutoring process?](https://onedrive.live.com?cid=c177b401a2934353&id=C177B401A2934353!saf4d10c1d8f445da81d391d51f40f2f7)**

[Speaker 1](https://onedrive.live.com?cid=c177b401a2934353&id=C177B401A2934353!saf4d10c1d8f445da81d391d51f40f2f7)

[[aa..] During group studies, [aa..]firstly [aa..] it depends upon time and availability of all group members. Otherwise one will skip some topic which will which will be being understand in his absence. Secondly, as we are human beings, we all we also have conflicts with one another, so if one we have a conflict and the topic is given to him or her, so our topic can be skipped because of our [chuckles] relationships](https://onedrive.live.com?cid=c177b401a2934353&id=C177B401A2934353!saf4d10c1d8f445da81d391d51f40f2f7)

[Speaker 2](https://onedrive.live.com?cid=c177b401a2934353&id=C177B401A2934353!saf4d10c1d8f445da81d391d51f40f2f7)

[Challenges faced during peer tutoring process I think so. Time management and balancing tutor tutoring commitments with our personal studies, adapting teaching methods to different learning styles. And addressing the conflicts or misunderstandings that between our group members.](https://onedrive.live.com?cid=c177b401a2934353&id=C177B401A2934353!saf4d10c1d8f445da81d391d51f40f2f7)

[Speaker 3](https://onedrive.live.com?cid=c177b401a2934353&id=C177B401A2934353!saf4d10c1d8f445da81d391d51f40f2f7)

[[aa..] Challenges that I have faced as a tutor or a tutor usually include again time management, the location, availability of my peers. Sometimes I'm not able to explain a topic as well as I know it as my concepts are so I have to delve into other concepts in order to explain to them. As a tutee I think sometimes I lag behind the group, sometimes I'm further ahead of the group and it can be either wasteful of my time, my own time, or either I can be wasting other’s time. [aa..] So I have to be careful of that and I think that [aa..] the people involved in the group are are important as sometimes you can't build a connection that well with certain students, whereas with others you have a deeper connection and the learning can be more profound. Thank you.](https://onedrive.live.com?cid=c177b401a2934353&id=C177B401A2934353!saf4d10c1d8f445da81d391d51f40f2f7)

[Speaker 4](https://onedrive.live.com?cid=c177b401a2934353&id=C177B401A2934353!saf4d10c1d8f445da81d391d51f40f2f7)

[Mostly challenges I face includes finding a good, quiet place to sit which isn't available here, plus a common studying time when everyone is free is difficult to find, to being tutored. The biggest challenge I face is that the tutee I am studying I am teaching are to are too unserious, and which also annoys me a lot.](https://onedrive.live.com?cid=c177b401a2934353&id=C177B401A2934353!saf4d10c1d8f445da81d391d51f40f2f7)

[Speaker 5](https://onedrive.live.com?cid=c177b401a2934353&id=C177B401A2934353!saf4d10c1d8f445da81d391d51f40f2f7)

[Challenges I face is [aa..] is the non serious attitude or behavior of my peers. Also they become they used to they use mobile or sporting Instagram or? [aa..] Social media are also they become talk too much that we all become distracted so that’s it.](https://onedrive.live.com?cid=c177b401a2934353&id=C177B401A2934353!saf4d10c1d8f445da81d391d51f40f2f7)

[Speaker 6](https://onedrive.live.com?cid=c177b401a2934353&id=C177B401A2934353!saf4d10c1d8f445da81d391d51f40f2f7)

[So the problems I face is as a tutor sometimes I cannot explain the concept very well and. I don't know any other way and how to explain it, so sometimes it kind of gets really hard, like how to explain that and as a tutee, maybe the pace of learning, sometimes I become really slow learner and I cannot go with the like the pace of my other peers.](https://onedrive.live.com?cid=c177b401a2934353&id=C177B401A2934353!saf4d10c1d8f445da81d391d51f40f2f7)

# Audio file

Voice 030.m4a

# Transcript

**Interviewer**

**Will you suggest to module using a peer tutoring? If yes then suggest the possibilities or outline a framework using that particular model.**

Speaker 1

[aa..]Everyone have his or her opinion, but according to me [aa..]according to me and and and in this environment, peer tutoring is not as much useful as I just get benefit studying alone because there is no space available to sit and study. Our times, as we are in different batches, our we don't have more time to sit together and study. [aa..] Secondly, [aaa…] during Summer it's harsh weather and we can't sit in the garden or somewhere to study. So related to this environment we can't [chuckle] I don't prefer a group studying.

Speaker 2

According to me, implementing our peer tutoring process can enhance your learning outcomes such as the framework, which I suggest would be training sessions or tutor regular feedback mechanism, structured study materials and supported support from the faculty to the tutor.

Audio file

[Voice 031.m4a](https://onedrive.live.com?cid=c177b401a2934353&id=C177B401A2934353!s316b9fcda0d645e78a17cbf22e3dd22d)

# [Transcript](https://onedrive.live.com?cid=c177b401a2934353&id=C177B401A2934353!s316b9fcda0d645e78a17cbf22e3dd22d)

[Speaker 3](https://onedrive.live.com?cid=c177b401a2934353&id=C177B401A2934353!s316b9fcda0d645e78a17cbf22e3dd22d)

[[aaaa…] I feel like uh If I were to suggest a module using peer tutoring, I would emphasize that all of the batches have the self study hours in the same hour that they are not distributed into different hours as in some batches have a skill lab while the other batch has self learning period self study period. I will I would also like to address that it should not be it should not be enforced that the student should have their own opinion as if they want to utilize that time for peer studying or not, they should not be forced to study even if they don't want to and I think that. They should be encouraged more and that the attendance [laughter] should be shouldn't be marked for that period.](https://onedrive.live.com?cid=c177b401a2934353&id=C177B401A2934353!s316b9fcda0d645e78a17cbf22e3dd22d)

[Speaker 4](https://onedrive.live.com?cid=c177b401a2934353&id=C177B401A2934353!s316b9fcda0d645e78a17cbf22e3dd22d)

[No, I don't think it should be included in our module as most of the student has have their own style of studying. Mostly students like to study alone and it also affect their method of studying and and it can be seen in their results. So it should be kept for for informal and only for those who like.](https://onedrive.live.com?cid=c177b401a2934353&id=C177B401A2934353!s316b9fcda0d645e78a17cbf22e3dd22d)

[Speaker 5](https://onedrive.live.com?cid=c177b401a2934353&id=C177B401A2934353!s316b9fcda0d645e78a17cbf22e3dd22d)

[Self study [aa..]Is not [aa..] Incorporate incorporate it in the module strictly. As students have a choice if they have to utilize self study or not also. The batches are different from my friends, so we have not almost not every everyone free for the self study. So it's our choice to self study or not.](https://onedrive.live.com?cid=c177b401a2934353&id=C177B401A2934353!s316b9fcda0d645e78a17cbf22e3dd22d)

[Speaker 6](https://onedrive.live.com?cid=c177b401a2934353&id=C177B401A2934353!s316b9fcda0d645e78a17cbf22e3dd22d)

[Firstly, I would like to emphasize that this institute, like they change batches every year and I think that's not suitable because we like in first year we have we we make our own tutoring groups and like when they suddenly change batches, we cant like cope with the other students or make the same pace with the other students, so it would be more easy if they didn't or like they they they used our opinion they for our batches like we could we should have the freedom to like decide our own batch and also peer to like there should be a time in college because we need skill labs to practice on each other on bone studying is also easy and for them.](https://onedrive.live.com?cid=c177b401a2934353&id=C177B401A2934353!s316b9fcda0d645e78a17cbf22e3dd22d)
