# Supplementary material for: Exploring Factors Affecting Informal Peer Tutoring Process Among Pre-Clinical Medical Students of a Private Medical College
Source: Research Square preprint supplement (doi:10.21203/rs.3.rs-5537207/v1), 2025-05-02
Supplement: Supplementary file 3 [file 28bbcb6e544dec64b40a23b9.docx]

**Qualsyst Scoring of the Selected Studies:**

The studies selected for critical appraisal were based on QualSyst scoring equivalent or more than 70%. Hence, for qualitative scoring, the number of selected articles was n=9 out of a total of 25. (Table 1)

For quantitative and mixed method scoring, the number of selected studies was n=16 out of a total of 25. (Table 2)

The checklists for scoring of qualitative, quantitative and mixed-method studies are attached in appendix A and B

**Table 1: Qualsyst scoring of qualitative and mixed method studies**

| Sr.  No. | Qualitative Articles | 1 | 2 | 3 | 4 | 5 | 6 | 7 | 8 | 9 | 10 | Score |
| --- | --- | --- | --- | --- | --- | --- | --- | --- | --- | --- | --- | --- |
| 1. | **(Alexander et al., 2022)** | 2 | 2 | 2 | 0 | 1 | 2 | 2 | 2 | 2 | 2 | 0.85 |
| 2 | **(Humphrey et al)** | 2 | 2 | 2 | 0 | 0 | 2 | 2 | 2 | 2 | 1 | 0.75 |
| 3 | **(Bowyer, Shaw. 2021)** | 2 | 2 | 2 | 0 | 2 | 2 | 2 | 2 | 2 | 1 | 0.85 |
| 4 | **(Shenoy & Petersen. 2020)** | 2 | 2 | 2 | 0 | 1 | 2 | 2 | 2 | 2 | 1 | 0.80 |
| 5 | **(Teresa Loda et al 2020)** | 2 | 2 | 2 | 0 | 2 | 2 | 2 | 2 | 2 | 2 | 0.90 |
| 6 | **(T. J. Bugaj, M. Blohm et al 2019)** | 2 | 2 | 2 | 0 | 1 | 2 | 2 | 1 | 2 | 1 | 0.75 |
| 7. | **(Burgess and McGregor 2018)** | 2 | 2 | 2 | 0 | 2 | n/a | 1 | 2 | 2 | 2 | 0.83 |
| 8. | **(Tamachi et al., 2018)** | 2 | 2 | 2 | 0 | 1 | 1 | 1 | 1 | 2 | 2 | 0.70 |
| 9. | **(Burgess et al. 2016)** | 2 | 2 | 1 | 0 | 1 | n/a | 1 | 2 | 2 | 2 | 0.72 |

**Table 2: QualSyst scoring of quantitative studies**

| Sr.  No. | Quantitative & Mixed  Method Articles | 1 | 2 | 3 | 4 | 5 | 6 7 | | 8 | 9 | 10 | 11 | 12 | 13 | 14 | Score |
| --- | --- | --- | --- | --- | --- | --- | --- | --- | --- | --- | --- | --- | --- | --- | --- | --- |
| 1. | (Nomura et al., 2023) | 2 | 2 | 2 | 2 | 2 | n/a | 0 | 1 | 2 | 1 | 2 | 2 | 2 | 2 | 0.84 |
| 2. | (Tanveer et al., 2023) | 2 | 2 | 2 | 2 | 2 | n/a | 0 | 2 | 1 | 1 | 2 | 2 | 1 | 2 | 0.80 |
| 3. | (Ahmed et al., 2023) | 2 | 2 | 2 | 2 | 2 | n/a | 1 | 2 | 1 | 1 | 2 | 2 | 2 | 1 | 0.84 |
| 4. | (Hari et al. 2022) | 2 | 2 | 2 | 1 | 2 | n/a | 1 | 2 | 1 | 2 | 2 | 2 | 2 | 2 | 0.88 |
| 5. | (Avonts et al., 2022) | 2 | 2 | 2 | 2 | 1 | n/a | 1 | 2 | 2 | 1 | 2 | 2 | 2 | 2 | 0.88 |
| 6. | (Li et al., 2022) | 2 | 2 | 2 | 1 | 2 | n/a | 0 | 1 | 1 | 2 | 2 | 2 | 2 | 2 | 0.78 |
| 7. | (Alessandra et al) | 2 | 2 | 2 | 2 | 1 | n/a | 1 | 1 | 1 | 2 | 2 | 2 | 2 | 1 | 0.75 |
| 8. | (Emily L. Lu et al) | 2 | 2 | 2 | 2 | 1 | n/a | n/a | 1 | 1 | 1 | 1 | 1 | 1 | 2 | 0.70 |
| 9. | (Khapre et al, 2021) | 2 | 2 | 2 | 2 | 1 | n/a | n/a | 0 | 1 | 1 | 1 | 2 | 2 | 2 | 0.75 |
| 10. | (Helen Pethrick. 2020) | 2 | 2 | 2 | 2 | 2 | n/a | n/a | 1 | 2 | 2 | 1 | 1 | 1 | 1 | 0.79 |
| 11. | (Loda et al., 2020) | 2 | 2 | 2 | 1 | 2 | n/a | 1 | 2 | 1 | 2 | 2 | 2 | 2 | 2 | 0.88 |
| 12. | (Loda T, Erschens R, Loenneker H, et al.) | 2 | 2 | 2 | 2 | 2 | n/a | n/a | 2 | 1 | 2 | 1 | 2 | 2 | 2 | 0.91 |
| 13. | (Robina Usman, Brekhna Jamil 2019) | 2 | 2 | 2 | 2 | 2 | n/a | n/a | 1 | 1 | 2 | 2 | 2 | 2 | 2 | 0.91 |
| 14. | (Kato Nomura et al. 2017) | 2 | 2 | 2 | 2 | 1 | n/a | n/a | 1 | 1 | 2 | 2 | 1 | 1 | 1 | 0.75 |
| 15. | (Gazulaa et al 2017) | 2 | 2 | 2 | 1 | 2 | n/a | n/a | 1 | 1 | 1 | 1 | 2 | 1 | 1 | 0.70 |
| 16. | (Burgess et al 2014) | 2 | 2 | 2 | 2 | 2 | n/a | n/a | 0 | 1 | 1 | 1 | 2 | 1 | 1 | 0.70 |

**Appendix A: QualSyst Criteria for Quantitative & Mixed Method Study Designs**

**Criteria Questions**

1. Question/objective sufficiently described?
2. Study design evident and appropriate?
3. Method of subject/comparison group selection or source of information/input variables described and appropriate?
4. Subject (and comparison group, if applicable) characteristics sufficiently described?
5. If interventional and random allocation was possible, was it described?
6. If interventional and blinding of investigators was possible, was it reported?
7. If interventional and blinding of subjects was possible, was it reported?
8. Outcome and (if applicable) exposure measure(s) well defined and robust to measurement /misclassification bias?
9. Means of assessment reported?
10. Sample size appropriate?
11. Analytic methods described/justified and appropriate?
12. Some estimate of variance is reported for the main results?
13. Controlled for confounding?
14. Results reported in sufficient detail?
15. Conclusions supported by the results?

**Scoring:**

- Yes: 2
- Partial: 1
- No: 0
- Score Formula: Total number secured/Maximum scoring (excluding n/a)

**Appendix B: QualSyst Criteria for Qualitative Study Designs**

**Criteria Questions:**

1. Questions/Objectives sufficiently described?
2. Study design evident & appropriate?
3. Context for the study clear?
4. Connection to theoretical framework/wider body of knowledge?
5. Sampling strategy described, relevant & justified?
6. Data collection methods clearly described & systematic?
7. Data analysis clearly described & systematic?
8. Use of verification procedure(s) to establish credibility?
9. Conclusions supported by the results?
10. Reflexivity of the account?

Scoring:

- Yes: 2
- Partial: 1
- No: 0
- Score Formula: Score/Maximum score (20) (excluding n/a)

**Literature Critical Appraisal and Article Tabulation:**

The critical analysis of 25 articles is tabulated as follows. Studies from the last 10 years are included in the literature critical appraisal based on a Qualsyst percentage of ≥ 70% or a score of ≥ 0.7.

**Table 3: Tabulated form of Critical Appraisal of selected articles**

| SR. NO | STUDY TITLE, NAME OF AUTHOR, NAME OF JOURNAL & YEAR OF PUBLICATION | RESEARCH QUESTION/OBJECTIVE | EMERGENT THEME | | QUALSYST SCORE | METHODOLOGY | LIMITATIONS/  RECOMMENDATIONS |
| --- | --- | --- | --- | --- | --- | --- | --- |
| 1. | Effect of problem-based learning tutor seniority on medical Students’ Emotions: an equivalence study  Nomura et al. BMC Medical Education (2023) 23:419  https://doi.org/10.1186/s12909-023-04416-9 | To investigate the effects of learning in near-peer sessions on a tutee’s progress, and feelings & to inquire about its equivalence within the formal curriculum of clinical reasoning. | Emotional impact on learning outcomes.  Impact of seniority levels on emotional outcomes. | | 0.84 | Quantitative equivalence study designed to compare the emotional outcomes among tutor-led and faculty-led groups. | Explore the relationship between emotional outcome with other related constructs such as motivation etc to understand the impact of the tutor’s teaching on the tutee’s emotions.  Conduct comparative studies in different cultural contexts. |
| 2. | Peer Teaching in Undergraduate Medical Education: What are the Learning Outputs for the Student-Teachers? A Systematic Review  Mohammed Anass Tanveer et al  Advances in Medical Education and Practice 2023:14 723–739  Published: 11 July 2023 | To describe learning outcomes of students & teachers from peer teaching, and to outline research methods used to assess these effects. | Learning outputs considered were subject-specific gains, understanding teaching skills & feedback strategies, enhancing personal development, and Generic Skills | | 0.80 | Systematic literature search in four electronic bases, ERIC, MEDLINE, PubMed, & Embase.  From 668 potential titles, 100 were obtained as full-texts, and 45 were selected. | Further research is required to enhance learning outcomes for both learners and teachers and to find out its impact on student’s learning in an organized framework |
| SR. NO | **STUDY TITLE, NAME OF AUTHOR, NAME OF JOURNAL & YEAR OF PUBLICATION** | **RESEARCH QUESTION/OBJECTIVE** | **EMERGENT THEME** | | **QUALSYST SCORE** | **METHODOLOGY** | **LIMITATIONS/**  **RECOMMENDATIONS** |
| 3. | Introduction of Near-Peer Mentorship Program in an  Undergraduate Medical College in Pakistan: A Pilot Study  Narmeen Ahmed,  Hindawi  Education Research International  Volume 2023, Article ID 7669033,  <https://doi.org/10.1155/2023/7669033> | To present a formal near-peer mentoring  program at Ziauddin Medical College and to recognize its effects on the participants of this program | Developing professional behaviors & values allows participants to reflect on themselves to achieve higher outcomes, a sense of belonging and institutional support and a healthy learning environment are a few main themes of the study. | | 0.84 | A quasi-experimental study over 5 months.  73 participants with 21 as tutors from 3rd year & 52 as tutees from 1st year.  Mentor -mentee ratio 1:2 | To gain information on long-term implications on the personal progress of the mentors and mentees and to improve the quality of the student support system.  To start student mentorship programs an organized framework should be planned. |
| 4. | What Makes a Near‑Peer Learning and Tutoring Program Effective in Undergraduate Medical Education: a Qualitative Analysis  Seth McKenzie Alexander, Gary L. Beck Dallaghan, Michele Birch, Kelly Lacy Smith, Neva Howard, Christina L. Shenvi  Medical Science Educator (2022) 32:1495–1502 | The research query was about the features of an effective PTP based on the views shared by tutors and tutees in the program. | The theme of this abstract is the evaluation of a peer tutoring program at a large public medical school, focusing on understanding its strengths, weaknesses, and benefits beyond traditional classroom-based learning. | | 0.85 | Survey-based qualitative research design.  56 learners & 20 tutors participated in the survey | The findings suggest that peer tutoring programs should emphasize tailored feedback and support in various dimensions, including metacognitive, content-based, and socio-emotional aspects, to effectively enhance learner success. |
| SR. NO | **STUDY TITLE, NAME OF AUTHOR, NAME OF JOURNAL & YEAR OF PUBLICATION** | **RESEARCH QUESTION/OBJECTIVES** | **EMERGENT THEME** | | **QUALSYST SCORE** | **METHODOLOGY** | **LIMITATIONS/ RECOMMENDATIONS** |
| 5. | Describing Ultrasound Skills Teaching by Near-Peer and Faculty Tutors Using Cognitive Apprenticeship  Roman Hari et al  Teaching and Learning in Medicine, An International Journal  2nd Nov 2022 | 1. How much time do near-peer tutors and faculty tutors each spend using various cognitive apprenticeship teaching methods while teaching ultrasound skills?  2. What are the similarities and differences in the time spent by near-peer tutors and faculty tutors on teaching methods and other activities from cognitive apprenticeship during ultrasound skills training? | Comparison of teaching methods used by peers and faculty and to examine effectiveness between near-peer and faculty tutors in the context of ultrasound skills education by using the cognitive apprenticeship model. | | 0.88 | Observational study of quantitative design with the use of 16 near-peer & 16 faculty-led ultrasound lessons. | The study observes the need for deeper exploration of potential quality markers of teaching methods.  Qualitatively explore participants' and tutors' experiences in practical ultrasound teaching to understand differences in the application of teaching methods by near-peer and faculty tutors. |
| 6. | Does peer teaching improve academic results and competencies during medical school? A mixed method study  Avonts et al.  BMC Medical Education (2022) 22:431  <https://doi.org/10.1186/s12909-022-03507-3> | The study explores how PAL influences the academic scores and the acquisition of essential competencies, such as medical expertise, collaboration, scholarship, leadership, and professionalism, in the context of medical education (CanMed competencies) | Identifies impact of peer teaching on non-academic competencies by comparing the academic scores of participants with CanMed competencies learnt. | | 0.88 | A combination of methodologies has been used. Retrospective cohort study  Modified Delphi technique. Snowball effect for literature review | Selection bias, study should be continued in diverse setting to achieve generalizable results and conduct longitudinal studies to infer long term impact of peer tutoring related to PAL strategy. |
| 7. | Does your group matter? How group function impacts educational outcomes in problem-based learning: a scoping review  Athena Li, Elif Bilgic, Amy Keuhl and Matthew Sibbald, Li et al. BMC Medical Education (2022) 22:900  <https://doi.org/10.1186/s12909-022-03966-8> | To explore the range and detail of existing literature that connects group function to PBL outcomes.  To identify key aspects of group function that significantly contribute to individual student learning outcomes in undergraduate health professional PBL. | Achievement of individual learning outcomes affected by group composition and group process. | | 0.78 | The literature was searched using Medline, CINAHL, and APA PsycINFO, covering the years 1980 to 2021.  The number of studies included was 48 | Methodology is the limitation. As use of only KP model provided a limited view to learning outcomes. |
| 8. | Medical Student Perceptions of Near Peer Teaching within an Histology Course at the University of Sassari, Italy  Maria Alessandra Sotgiu et al.  Educ. Sci. 2022, 12, 527.  https://doi.org/10.3390/educsci12080527  Academic Editor: James Albright | To evaluate medical students' views on the value of near-peer tutoring for a course in the human organ histology component of anatomy. | NPT program is introduced for histology as an educational strategy. | | 0.75 | Observational, cross-sectional study | The reliability of the study was limited due to small sample size.  Recommended to conduct further research on learning style preferences and learning strategies used by peer tutors.  Further study should be conducted on variation of quality of NPT in the absence of any formal training. |
| 9. | Near‑Peer Teaching in Conjunction with Flipped Classroom to Teach First‑Year Medical Students Basic Surgical Skills  Emily L. Lu et al  Medical Science Educator (2022) 32:1015–1022  Original Research Published: 01 August 2022 Volume 32, pages 1015–1022, (2022) | To evaluate the course of basic surgical skills for first-year medical students through a combination of an educational technique of NPT and FC.  To assess the impact of two strategies on the development of self-confidence in performing basic surgical skills among pre-clinical medical students. | Combining the two methodologies of NPT & FC to enhance the learning capability of basic surgical skills of medical students in the first year of a training program.  Combining the strategies to augment the cognitive, psychomotor, and affective development | | 0.70 | Single- blinded Prospective, Randomized Control Trials | Small sample size has reduced the reliability of the study.  Further study can be conducted in objectively assess the skills acquired through the course. |
| 10. | Coproducing the Learning Environment: Lessons Learned from a Year of Near-Peer Teaching  Kristen N. Humphrey, Robert S. Daulton1, Danielle Weber, Dana Sall and Matthew Kelleher  Journal of Medical Education and Curricular Development Volume 9: 1–4 | The study aimed to explore the impact of the one-year elective program of NPT. | Prepare students for teaching roles in clinical skill courses. | | 0.75 | Exploratory qualitative study. The narrative centers around 6 takeaways focusing on producing 4th-year medical students as effective teachers in a novel longitudinal elective course. | Creating a safe learning environment by encouraging student growth, fostering independent thinking, and empowering learners to seek help when needed. We hope these teaching insights will enhance the learning experience for both educators and students. |
| 11. | Informal Near‑Peer Teaching in Medical Education: A Scoping Review  Eleanor R. Bowyer, Sebastian C. K. Shaw  Education for Health, 2021 | To explore the scope of informal peer tutoring in medical education. | Occurrence of informal peer tutoring process that occur in casual settings with independent instructional preferences. | | 0.85 | Scoping review from PubMed database. Combinations of the terms “near peer teachers”, “near peer tutoring”, “near peer tutors”, “near peer mentoring”, “near peer mentors”, and “medical education” were used. Searches were undertaken up to March 2021 | Further research is needed on the process of informal near-peer tutoring, including how to support and guide both near-peer tutors and their learners, while also addressing potential issues like lack of content monitoring and resources. |
| 12. | Near-Peer Tutor: A Solution for Quality Medical Education in Faculty Constraint Setting  Khapre M, Deol R, Sharma A, et al. (July 16, 2021)  Cureus 13(7): e16416. DOI 10.7759/cureus.16416 | To evaluate the impact of near-peer mentoring on knowledge acquisition and skill development, thereby improving learning outcomes in health science students. | Validation of NPT program as a quality assured effective alternative to faculty constraint medical institutions. | | 0.70 | Systematic review and Meta-analysis following the guidelines of the PRISMA checklist using PubMed, Embase, Scopus, and Cochrane. 16 studies were analyzed. March 2020 to March 2021 | Near-peer programs should be part of curriculum delivery from the start of their medical career as an undergraduate student. |
| 13. | Peer mentoring in medical residency education: A systematic review  Helen Pethrick  Canadian Medical Education Journal, CMEJ 2020, 11(6), e128-e137; Available at http://www.cmej.ca  Published ahead of issue: October 11, 2020; published: December 7, 2020 | To explore the extent to which peer mentoring relationships support medical residents’ mental well-being, social connectedness, and the development of academic and career competencies or skills. | Development of competencies and psychosocial well-being through peer mentoring | | 0.79 | Search through Six databases (MEDLINE, EMBASE, PsycINFO, Academic Research Complete, ERIC, Education Research Complete) | Further robust research is required to observe the comparative benefits of informal and formal peer mentoring and to highlight best instructional practices for a progressive design of peer mentorship programs. |
| 14. | Peer Tutoring in Preclinical Medical Education: A Review of the Literature  Adele Shenoy & Kristina H. Petersen  Medical Science Educator (2020) 30:537–544  <https://doi.org/10.1007/s40670-019-00895-y> | To investigate the effects of the implementation, strengths, and weaknesses, and to classify methods of peer tutoring programs incorporated in these preclinical courses.  Aims to analyze the outcomes of various types of Peer Tutoring | Comparison of different peer tutoring types.  Integration of peer tutoring in medical education as an instructional strategy. | | 0.80 | Comprehensive literature research through databases such as PubMed, MedLine, and Google Scholar  49 relevant studies were analyzed from year 1984 till 2019 | A guide based on information should be used for further program development and help institutions cater to programs that can produce successful students. |
| 15. | Qualitative analysis of cognitive and social congruence in peer-assisted learning – The Perspectives of medical students, student tutors, and lecturers Teresa Loda et al  MEDICAL EDUCATION ONLINE, 2020, VOL. 25, 1801306  https://doi.org/10.1080/10872981.2020.1801306 | To investigate cognitive and social congruence with a focus on the student tutors’ and students’ relationship | Aspects of learning aligned with elements of cognitive and social congruence in the peer-assisted learning process.  . | | 0.90 | Exploratory qualitative study | Generalizations of the results are limited.  Future studies could also focus on the role of student tutors as they might influence the relationship between students and lectures |
| 16. | A novel instrument of cognitive and social congruence within peer-assisted learning in medical training: construction of a questionnaire by factor analyses. Loda et al. BMC Medical Education (2020) 20:214  <https://doi.org/10.1186/s12909-020-02129-> | To operationalize cognitive and social congruence, on a behavioral level of student tutors and students by using a newly developed questionnaire. | Informal communication, approachable tutors, same knowledge base & open learning environment were positive outcomes associated with cognitive congruence. Social congruence highlighted the supportiveness of tutors in helping students, showing empathy, and showing interest in student problems as a enhanced trustworthy relationship. | | 0.88 | Cross-sectional design with a quantitative questionnaire survey.  Participants were from different semesters of different medical years.  676 medical students and 149 student tutors. | Further, investigate the impact of cognitive and social congruence on the effectiveness of peer-assisted learning.  Recommendations included the development and implementation of courses that focus on relevant aspects of attitudes for students who are in proximity socially and cognitively. |
| 17. | Cognitive and social congruence in peer-assisted learning – A scoping review  Loda T, Erschens R, Loenneker H, et al.  PLoS ONE 14(9): e0222224. Published: September 9th, 2019 https://doi.org/10.1371/journal.pone.0222224 | To present a scoping review of cognitive and social congruence in peer learning, including a meta-analytic pooling of previous studies on this topic. | To determine cognitive and social congruence in PAL activities as the core theoretical concept. | | 0.91 | Scoping review using PRISMA guidelines. | Further studies should pay attention to the interconnectedness of cognitive and social congruence. Factors should be explored for enhancing cognitive and social proximity. |
| 18. | Peer-assisted learning (PAL): skills lab  tutors’ experiences and motivation  T. J. Bugaj, M. Blohm et al  Bugaj et al. BMC Medical Education (2019) 19:353  https://doi.org/10.1186/s12909-019-1760-2 | To observe the undergraduate students in their roles as skills lab peer tutors. How they motivate to become a tutor and to assess the importance of cognitive & social congruence in their teaching experiences | Motivation for students to become tutors. Personal and professional development in diverse aspects of learning through elements of social and cognitive congruence. | | 0.75 | Qualitative content analysis using in-depth & semi-structured interviews. | Generalizability was limited.  Feedback mechanisms on student’s performance as tutors were not gathered from student learners.  Future training programs can be devised for highly effective student tutors. |
| 19. | PERCEPTIONS OF UNDERGRADUATE MEDICAL STUDENTS ABOUT PEER ASSISTED LEARNING.  Robina Usman, Brekhna Jamil  Professional Med J 2019; 26(8):1283-1288.  DOI:10.29309/TPMJ/2019.26.08.3870 | To evaluate how students perceive PAL sessions in a small group format at the level of undergraduate training medical programs. | PAL enhances motivation to learn the relevant content and acquire generic skills such as communication, and psychomotor development, exclusive benefits to tutors. | | 0.91 | Cross-sectional study | PAL is appreciated as an effective instructional strategy so it should be formally incorporated in the curriculum with pre-determined objectives. |
| 20. | Peer teacher training for health professional students: a systematic review of formal programs  Annette Burgess, and Deborah McGregor  Burgess and McGregor BMC Medical Education (2018) 18:263  https://doi.org/10.1186/s12909-018-1356-2 | What is the rationale for implementing teacher training programs?  What is the design and content included in the peer teacher training programs?  How is student competence in peer teaching skills assessed? How are the teacher training programs evaluated? | Teaching as a core competence skill.  A formalized training program will enable the institutions to prepare students in effective teaching roles. | | 0.83 | Five databases were used for thorough literature search  PubMed, Embase, CINAHL, ERIC & Cochrane Collection, using predetermined criteria. | Formal training programs should be emphasized across the world to receive maximum benefits for students, teachers, and institutions.  Should be a formal part of the curricula focusing on interprofessional medical education. |
| 21. | “You understand that whole big situation they’re in”: an interpretative phenomenological analysis of peer-assisted learning.  Shameena Tamachi, James A. Giles, Tim Dornan and Elspeth J. R. Hill  Tamachi et al. BMC Medical Education (2018) 18:197  https://doi.org/10.1186/s12909-018-1291-2 | How do the peer relationships of students within PAL sessions influence their experience in personal development and help them in mediating their learning? | Perceptions revealed that safe learning environment and teamwork enhance motivation, and a hidden curriculum enhances the personal learning development of learners. | | 0.70 | Phenomenological qualitative research design | To use insights from PAL for faculty and curriculum development. |
| 22. | Medical students can teach communication skills – a mixed methods study of cross-year peer tutoring.  Osamu Nomura, Hirotaka Onishi and Hiroyuki KatoNomura et al. BMC Medical Education (2017) 17:103  DOI 10.1186/s12909-017-0939-7 | To confirm the non-inferiority of the objective educational outcomes (OSCE Scores) of medical interview training using CYPT compared with faculty-led training (FLT).To explore qualitatively the educational benefits of CYPT for undergraduate communication training. | Effectiveness of Cross year Peer Tutoring Program Compared to Tutoring Program led by Faculty in terms of Objective Outcomes and Perceptions of Participants | | 0.75 | Convergent Mixed-method study with Randomized controlled trials and 2 focus group | The study recommends for tutor training programs, alternating responsibilities among tutors, and incorporating CYPT as communication training programs. |
| SR NO. | **STUDY TITLE, NAME OF AUTHOR, NAME OF JOURNAL & YEAR OF PUBLICATION** | **RESEARCH QUESTION/ OBJECTIVES** | | **EMERGENT THEME** | **QUALSYST SCORE** | **METHODOLOGY** | **LIMITATIONS/ RECOMMENDATIONS** |
| 23. | A Systematic Review of Reciprocal Peer Tutoring within Tertiary Health Profession Educational Programs  Swapnali Gazulaa, Lisa McKennab, Simon Cooperd, Penny Paliadelisc  Science Direct, Health Professions Education 3 (2017) 64–78  <https://doi.org/10.1016/j.hpe.2016.12.001> | To investigate the academic and generic benefits of the Reciprocal Peer Tutoring program.  To identify the challenges encountered during the RPT Program | | RPT Program as an effective educational strategy, informs best evidence practices devising guidelines for incorporating this teaching mode formally in the medical curricula. | 0.70 | Systemic review approach using CASP (Critical Appraisal Skills Program) Checklist | Limitations are limited published resources, participants selection, reduced teaching expertise in student tutors.  Future recommendations demand vigorous research in RPT Programs in terms of tutors teaching skills, institutional support and resource allocation, group composition and consideration of individual tutor needs. |
| 24. | Peer tutoring in a medical school: perceptions of tutors and tutees  Annette Burgess, Tim Dornan, Antonia J. Clarke, Audrey Menezes, and Craig Mellis  Burgess et al. BMC Medical Education (2016) 16:85  DOI 10.1186/s12909-016-0589-1 | To explore medical students’ perceptions of their experience of taking part in a newly established Experienced based Learning Model (ExBL) peer tutoring program at a clinical school | | Innovative opportunities of formal/semi-formal programs enhance the learning experiences of student tutors and tutees. | 0.72 | Qualitative study design with framework analysis of the new ExBL program | Generalizability and volunteer bias were the limitations.  Initiatives in formalizing the peer program are recommended to take quality assurance measures, organizational support and incentivize volunteers. |

| SR. No. | STUDY TITLE, NAME OF AUTHOR, NAME OF JOURNAL & YEAR OF PUBLICATION | RESEARCH QUESTIONS/ OBJECTIVES | EMERGENT THEME | QUALSYST SCORE | METHODOLOGY | LIMITATIONS/ RECOMMENDATIONS |
| --- | --- | --- | --- | --- | --- | --- |
| 25. | Medical students as peer tutors: a systematic reviewAnnette Burgess, Deborah McGregor and Craig Mellis, Burgess et al.  BMC Medical Education 2014, 14:115  <http://www.biomedcentral.com/1472-6920/14/115> | To investigate how PAL activities have been devised in terms of recruitment and training of student tutors, and to explore what competencies have been enhanced in training programs. | Activities introduced in PAL process are beneficial to both tutors and tutee. | 0.70 | Systematic literature review using 3 electronic databases resulting in inclusion of 19 articles. | Variable results in peer assessment and lack of substantial evidence have contributed to its limitations.  Study recommends for more research on PAL activities and collection of more objective outcomes. |
