# Supplementary material for: Exploring Factors Affecting Informal Peer Tutoring Process Among Pre-Clinical Medical Students of a Private Medical College
Source: Research Square preprint supplement (doi:10.21203/rs.3.rs-5537207/v1), 2025-05-02
Supplement: Supplementary file 4 [file 438a6fcdcae08a113d0667c7.docx]

**FOCUS GROUP DISCUSSION – 3**

**Pre-clinical medical students – 1st Year MBBS**

**AM College, Rawalpindi**

**06 participants**

**8th July 2024**

# Audio file

Voice 040.m4a

# Transcript

**Interviewer**

**OK. Can you describe your typical day in the preclinical year of a medical program?**

Speaker-1

Yes, a typical day usually starts for a medical cadet or a medical student when he wakes up and he is mentally first half prepared for the day. He, I personally, or one personally begins with definitely like prayers and sorting out the books and bag etcetera for the day and pull up the socks I would say. And move on onwards. After the breakfast, we land here at college and we are followed by a assembly that is like personal to the college, not in general. it is specific, but generally speaking, when we come to the classes, we are overwhelmingly like exposed to a lot of knowledge in a day. Followed by like little breaks and a lot of knowledge to be digested by a preclinical medical student. And then, after the classes are over, one goes back to the hospital or to the home or wherever he or she. Gives. And then he finds it out. It says personal routine. Like if he wants to get a nap, get a rest, or he or she wants to go to the gym. I personally prefer that for the relaxation. And afterwards we generally start studying because it's a long, hectic day which has to be covered. If you do not revise it to be precise. You get to end up with something that has vague memory.

Speaker-2

Personally, when he started in college, of course we were exposed to a lot of knowledge which can be overwhelming at times, but you have to just go on and you know, you have to just go through the day, at least in college and. Once we go back, we have to. It depends if you want to have some rest or if you want to, you know, just rent out some of the day. And after that in the evening you usually have some you have some study time and it depends on the topic. If you want to do it in groups or if you want to do in study. If you if you want to do in groups. And that's just a normal.

# Audio file

[Voice 041 1.m4a](https://onedrive.live.com?cid=c177b401a2934353&id=C177B401A2934353!s495bd2312d03412aa088b8de2bb2c7d5)

# [Transcript](https://onedrive.live.com?cid=c177b401a2934353&id=C177B401A2934353!s495bd2312d03412aa088b8de2bb2c7d5)

[Speaker 3](https://onedrive.live.com?cid=c177b401a2934353&id=C177B401A2934353!s495bd2312d03412aa088b8de2bb2c7d5)

[Our typical day in COLLEGE usually starts at the morning and one of the most you can say big things is that we have to, we have to wear our orderly, which is not easy. Of course, this orderly and all this stuff and then generally our classes start. One thing is that we generally go to college much earlier. When our classes start about one hour later, so usually if there is not falling. So we generally study at that time. Or sometimes if our sleep is not well, so we doze off at that. Time. And then the classes start and usually there are three straight classes before a break. So usually in the till the 3rd class we are almost exhausted. And but it can depend upon individual person that someone can maintain his or finds interesting more Physiology or biochemistry, but generally till the break first break we are almost exhausted. The break, I must say it is refreshing and then there is a straight you know two hour session of an Acme. And during which our teachers generally grant grant us some two or three breaks. So we are thankful for that. And then there is at the end of the day, there is our practical session and the practical session is that part of the day in which you know, you are saying that just the day is dragging on and you just want to go home and you really do not want to sit there so you. You have to push yourself and then typically we go to our hostels, we do our lounge. And as Abdullah said that it is then personal preference but routine do we want to follow? I generally take a very short nap and then I hang out with friends till evening and then after the evening following I study till night and so generally. This is our routine.](https://onedrive.live.com?cid=c177b401a2934353&id=C177B401A2934353!s495bd2312d03412aa088b8de2bb2c7d5)

# Audio file

Voice 042.m4a

# Transcript

Speaker 4

So we usually get up at 6:00 AM. Then we have to come to college by we reach as we are outliers. So we come by college bus. So we reach till 7:30. Then we get a call in. So our classes usually start at 8. OK. So after that we have we have an admin classes. Between them and breaks. Also, we have lab classes so we get to learn a lot. I think Tuesdays and Mondays and Thursdays are a bit tiring because we have CVLS tomorrow, so we have to prepare for it also. So it depends on how much we learn today. So if there is, if there is not enough study, so it's it's kind of I think it's kind of a balanced routine. We we manage it, but I think Mondays and Thursdays are a bit hectic for.

Speaker 5

So first of all, being in liver, it is obviously quite difficult to manage the routine because if I'm a person who wants to study more in the early morning, I can't because there is like falling conjunctively one after another. So there is a wastage of time like two to three hours. Also in the evening, also in the morning, so and also the medical students study, it is different from the FAC because you can't manage the whole lectures and learn those things within a day. And after going to hostel we do lounge and obviously human brain needs time. After these exhausting lectures. So after having a short nap, there is assembly and we are left with like six to five words maximum. And in these words I don't think so that we can manage the whole scenario and the whole flavors of the day. So there is some deficiency of every subject which we have to cover in the weekend.

Speaker 6

I usually wake up early in the morning to revise the previous lectures, then get ready for the college, eat breakfast and there, then there is falling. Then we come to the college and again have a fall. In. And then our lecture starts and till mid of the day of course we are exhausted, but the breaks help and till the end of the day. We are. We have no energy left after that. We go to the hotel and eat our lunch, take a nap, then take some rest time and start studying after. Studying for like hour or two again, we have a fall in and then we eat our dinner and again just one to two hours of studying and then we go to sleep. But I agree with the point that on Mondays and Thursdays those are very hectic days because we have our CBLS and. Study time that we get is not enough to prepare for it.

# Audio file

Voice 043.m4a

# Transcript

**Interviewer**

**How do you explain the role of a student in teaching and learning as a teacher?**

Speaker-1

A student can himself be a good teacher and a good learner because he observes both of them closely. He observes a student closely because he is a part of a community that is a student community. He himself is a student, and he observes the teacher too very closely. And he sees what are the goods and what are the bads as a student for, of the teacher. Like, if the teacher could have done this, I might would have learned this from that particular wordings of him or that particular notion of the teacher. So he is a good observer in the 1st place. So that is why he can have a very vital role in being a student. There as a learner and as a teacher. Well, as a learner, a student can be of multiple types. He can learn with his. Everyone has his various styles of learning so depends upon the student and his role in learning is mostly that he might consult he or she might consult books, he might be like dependent upon the faculty he might be. More inclined towards the peer studying the group studying or maybe an individual studying. Or maybe he might be also be a I would say victim of procrastination study and then as a teacher, a student, we personally expect a student to be a better teacher because he himself knows how to strike and where to strike as a teacher because he himself is a student. So as a teacher in a peer study or in a group, a student generally explains well because he knows the local language, he knows the body language. He knows the dialect, he knows each and everyone individually whom he is talking to. He knows what he likes, what he dislikes, and his preference is not preferences. So that is, I would say, his role is pivotal and his role is vital.

# Audio file

[Voice 044.m4a](https://onedrive.live.com?cid=c177b401a2934353&id=C177B401A2934353!sc9bf49c76615422bbc735910a3458d5c)

# [Transcript](https://onedrive.live.com?cid=c177b401a2934353&id=C177B401A2934353!sc9bf49c76615422bbc735910a3458d5c)

[Speaker-2](https://onedrive.live.com?cid=c177b401a2934353&id=C177B401A2934353!sc9bf49c76615422bbc735910a3458d5c)

[The role of a student is quite pivotal, especially in our case as MCS, because MCS have like all the in livers actually because all of them have spent a lot of time together and they know the pros and cons in the way of learning of each other. So a student can, you know, put him or her in the shoes of his other course mate and help the other student if he's having any sort of difficulties, because of course he's living with him. He's sort of living the exactly the same life, the orderlyed life, and he could tell if any teacher is, you know, his, his teaching style is not compatible with the students learning style or vice versa. So in this way, the student can help a lot, especially to his fellows.](https://onedrive.live.com?cid=c177b401a2934353&id=C177B401A2934353!sc9bf49c76615422bbc735910a3458d5c)

# Audio file

[Voice 045.m4a](https://onedrive.live.com?cid=c177b401a2934353&id=C177B401A2934353!s242cedb48c2d41d6b2d8663dc841a226)

# [Transcript](https://onedrive.live.com?cid=c177b401a2934353&id=C177B401A2934353!s242cedb48c2d41d6b2d8663dc841a226)

[Speaker-3](https://onedrive.live.com?cid=c177b401a2934353&id=C177B401A2934353!s242cedb48c2d41d6b2d8663dc841a226)

[Then basically the role of a student in being a teacher. You can say that a student during his class, he interacts with different teachers and gets to know the teaching style of all the teachers, and he himself analyzes that which teaching style is best for him. So when he or she teaches some of his peers, then he takes into account all the pros and cons of his teachers and tries to adapt his teaching style in the way that he best understands and also he can get feedback from his peers that is he teaching well or is he explaining or are you getting the things so he can modify his teaching style a bit. And one more thing is that when you are planning to teach someone, you just don't stick to the resources or you just don't, you are not just in a sort of mood to learn yourself. But when you are trying to explain something to other, you get deep into that and you you try different sources and you amalgamate the knowledge in a way that it can be easily explained. So your own understanding of that topic while preparing for teaching and while teaching it gets very good. So I think teaching for a student is really a good way to learn and to master concepts and as a student you can say basically our role as a student is to take information and all that. So teaching can be a good way to consolidate that information.](https://onedrive.live.com?cid=c177b401a2934353&id=C177B401A2934353!s242cedb48c2d41d6b2d8663dc841a226)

# Audio file

Voice 046.m4a

# Transcript

Speaker-4

Ma'am, the role of student in teaching is I think very important because sitting at those chairs student knows because a student cannot understand every teacher because he understands that it's not according to what I want to learn from the lecture. So he is critically evaluating everything sitting in those chairs. So I think teachers also have a major role, as student also goes a student, goes through many books, he consults many books so he he can be a good listener obviously he is a good listener, but I think he can be a good teacher. But I would say it's not easy preparing presentations and teachers. Also have the main role so I think he would be a good teacher

Speaker -5

So in my vision I think a student is a good learner instead of a good teacher because a teacher has become teacher after a lot of like hard work and struggle, you can't compete that. But a student can be a good teacher only to that specific topics which he has learned from that good teacher not all the topics because when you are teaching someone, you don't know the other person’s intelligence. If other person ask you some question that you don't know, then I think that is not the level of your teaching that you don't know the answer of the other persons questions because if we compare a student with a teacher, a teacher knows the answer of those questions because he has spent a lot of years in correlating everything. But student can be a good teacher if he teaches to his fellow because he knows that both of us have same mental thinking, but not to a person who is like more mature to that person because that maturity is quite different and that topic is quite different. You can't answer to those questions.

Speaker-6

I think that a student can be a good teacher after learning from a teacher himself or someone else, because we might think that we have a good grip on the topic and all. But after learning it from the teacher, we get to know many more points and there's endless knowledge that we can get from a teacher. So I think a student even, if he or she wants to be a good teacher, he first has to be a good learner.

# Audio file

[Voice 047.m4a](https://onedrive.live.com?cid=c177b401a2934353&id=C177B401A2934353!s2f2900879ec44358accdb8543d4c0ced)

# [Transcript](https://onedrive.live.com?cid=c177b401a2934353&id=C177B401A2934353!s2f2900879ec44358accdb8543d4c0ced)

**[Interviewer](https://onedrive.live.com?cid=c177b401a2934353&id=C177B401A2934353!s2f2900879ec44358accdb8543d4c0ced)**

**[OK. How do you plan and execute your peer tutoring process? How do you start, arrange a group, manage your time and decide on the roles?](https://onedrive.live.com?cid=c177b401a2934353&id=C177B401A2934353!s2f2900879ec44358accdb8543d4c0ced)**

[Speaker 1](https://onedrive.live.com?cid=c177b401a2934353&id=C177B401A2934353!s2f2900879ec44358accdb8543d4c0ced)

[It's generally a spontaneous process because no one really plans to find a group for study, or no one really plans to gather someone to study a particular topic. One fine morning you get up and you are going with someone and you will end up deciding that we should sit together and I guess this topic is like better learned by that one particular person than us. So we should rather gather together and we will get to learn that from this person. So it's generally a spontaneous process in my regard. It can be well, it can be pre planned when a person, when there is a group in a class like I have personally a group of three people and we generally see that who has a good grip on which subject. And who is more active in the classes. Who is active other other times than the classes? Like who is good at learning things from Internet? Who is good at learning things from the? Library. So we gather all that facts and owing to all that facts, we finally decide that the Group of us three should sit together and this subject the facing. Difficulties that we are facing in this particular subject or even a single person if he is facing the other two, are comfortable with that, he, they they are supposed to teach that one particular person because it's a group after all. So it's more of like that.](https://onedrive.live.com?cid=c177b401a2934353&id=C177B401A2934353!s2f2900879ec44358accdb8543d4c0ced)

# Audio file

[Voice 048.m4a](https://onedrive.live.com?cid=c177b401a2934353&id=C177B401A2934353!sc2714bde7cc940b896e5ab78de1d14cc)

# [Transcript](https://onedrive.live.com?cid=c177b401a2934353&id=C177B401A2934353!sc2714bde7cc940b896e5ab78de1d14cc)

[Speaker-2](https://onedrive.live.com?cid=c177b401a2934353&id=C177B401A2934353!sc2714bde7cc940b896e5ab78de1d14cc)

[It is not generally a spontaneous process in my case because we are a group of six friends and all of us share the same routine of course, we have those assemblys of battalion assemblys in the evening, we share the same routine almost. About the time it's just after the evening lounge we all decide to, you know, we should just come into one room and start to study. Regarding the contribution of students all of us have some sort of contribution. Personally, in my case, one of our friend is he has already done his first year from King Edward. So there is no sort of debate in who will take the charge. But there are other contributors as well. Some of us have some subscriptions online, so we, you know, you could just contribute it for your other peers who do not have those subscription and after that we just try to study and this is how we go now.](https://onedrive.live.com?cid=c177b401a2934353&id=C177B401A2934353!sc2714bde7cc940b896e5ab78de1d14cc)

[Speaker-3](https://onedrive.live.com?cid=c177b401a2934353&id=C177B401A2934353!sc2714bde7cc940b896e5ab78de1d14cc)

[So I think that peer learning sessions are of two types. In the first type, we just decide that we are going to study this topic together and we sit together and study. Really. And at times when a person is having some question, the other one, he can intervene and the other one, if he gets that, he can answer that and the other type is that we generally at the start of the day or when the friends we are talking, we can template that OK you have done this topic well and you haven't done that. You have done that and you have done that. So generally, some people, of course they have covered that or they are good in that. So we say that you can teach us that and you will teach us in return that topic to you. So while teaching, we just during contemplating, we decide that we want to have these sessions. And while teaching generally we because they are our peers. So we can go informal with them and we can ask all the questions that we have in our mind. And we can explain them in any way we want. So I think generally if you have a good grip on any topic and if you want to teach or if you want to learn from anyone, then it is really productive and I think it should be promoted.](https://onedrive.live.com?cid=c177b401a2934353&id=C177B401A2934353!sc2714bde7cc940b896e5ab78de1d14cc)

# Audio file

[Voice 049.m4a](https://onedrive.live.com?cid=c177b401a2934353&id=C177B401A2934353!saf0ac3ff023e4db3990e67dee6d1d56f)

# [Transcript](https://onedrive.live.com?cid=c177b401a2934353&id=C177B401A2934353!saf0ac3ff023e4db3990e67dee6d1d56f)

[Speaker-4](https://onedrive.live.com?cid=c177b401a2934353&id=C177B401A2934353!saf0ac3ff023e4db3990e67dee6d1d56f)

[What we do is we usually decide one day before that which topic do we have to cover we see the schedule if there is any break or if there is any self-study period. So on that day we usually divide the topic because some topic is well understood by that specific person or the other is understood by any other. So we divide the topic and then he teaches us and also he asks he or she asks questions. So it becomes very easy and I think peer discussion reduces, I think it helps a lot because we don't when we go home, we just have to read it through once. We just have to go through it once. It helps a lot.](https://onedrive.live.com?cid=c177b401a2934353&id=C177B401A2934353!saf0ac3ff023e4db3990e67dee6d1d56f)

[Speaker-5](https://onedrive.live.com?cid=c177b401a2934353&id=C177B401A2934353!saf0ac3ff023e4db3990e67dee6d1d56f)

[So might be my opinion would be negating like personally I do not do group studies because I'm the person who wants to study like in In loneliness because I think when you are when you try to study with your friends you can't because everyone cracks a joke at some time and also like I preferred that if other person knows this thing, why shouldn't I? I should learn this by myself and in the struggle to learn this thing I will definitely explore to different things ultimately. And it will ultimately it will increase my knowledge because I teach different topics to others, but I do not get used to these things that I need help from my fellows. I will prefer my teacher to my opinion, but I am not saying that group study is not advantageous at all. It is advantageous, because when you are discussing something with your friends, that thing gets like it gets copied in your brain and you can't forget it anytime.](https://onedrive.live.com?cid=c177b401a2934353&id=C177B401A2934353!saf0ac3ff023e4db3990e67dee6d1d56f)

[Interviewer: So you basically are a tutor more, but you don't like to be tutee.](https://onedrive.live.com?cid=c177b401a2934353&id=C177B401A2934353!saf0ac3ff023e4db3990e67dee6d1d56f)

[Speaker-5](https://onedrive.live.com?cid=c177b401a2934353&id=C177B401A2934353!saf0ac3ff023e4db3990e67dee6d1d56f)

[I do not get indulge in these type of groups readings because….](https://onedrive.live.com?cid=c177b401a2934353&id=C177B401A2934353!saf0ac3ff023e4db3990e67dee6d1d56f)

[Speaker-3](https://onedrive.live.com?cid=c177b401a2934353&id=C177B401A2934353!saf0ac3ff023e4db3990e67dee6d1d56f)

[My point is also the same, but first of all you should engage in primary studies yourself](https://onedrive.live.com?cid=c177b401a2934353&id=C177B401A2934353!saf0ac3ff023e4db3990e67dee6d1d56f)

[First of all, you should do your primary study yourself and then if you think that you still can't get over it or you need help, then you should consult your friends, because studying alone is studying with friends can never be replacement of studying alone, because the knowledge that you can grasp alone or the deep focus that which you can access when studying alone, so studying with friends is not a substitute for that, so both of the things are important.](https://onedrive.live.com?cid=c177b401a2934353&id=C177B401A2934353!saf0ac3ff023e4db3990e67dee6d1d56f)

# Audio file

[Voice 050.m4a](https://onedrive.live.com?cid=c177b401a2934353&id=C177B401A2934353!s3ffc90b85e74479b9c22ec492884cf3c)

# [Transcript](https://onedrive.live.com?cid=c177b401a2934353&id=C177B401A2934353!s3ffc90b85e74479b9c22ec492884cf3c)

[Speaker-6](https://onedrive.live.com?cid=c177b401a2934353&id=C177B401A2934353!s3ffc90b85e74479b9c22ec492884cf3c)

[Usually when we have an exam coming up, we all study in the study room and when there is a topic which some of us do not have a good grip on, we ask a person who has a good grip on it and then she teaches us that topic and then we study on our own only the topics that we are not very good at the other person teaches us.](https://onedrive.live.com?cid=c177b401a2934353&id=C177B401A2934353!s3ffc90b85e74479b9c22ec492884cf3c)

# Audio file

[Voice 051.m4a](https://onedrive.live.com?cid=c177b401a2934353&id=C177B401A2934353!s6e2bb7fee01b4cb4ac0f382b745f84a0)

# [Transcript](https://onedrive.live.com?cid=c177b401a2934353&id=C177B401A2934353!s6e2bb7fee01b4cb4ac0f382b745f84a0)

**[Interviewer](https://onedrive.live.com?cid=c177b401a2934353&id=C177B401A2934353!s6e2bb7fee01b4cb4ac0f382b745f84a0)**

**[What factors affect your decision to join or participate in Group of peer tutoring?](https://onedrive.live.com?cid=c177b401a2934353&id=C177B401A2934353!s6e2bb7fee01b4cb4ac0f382b745f84a0)**

[Speaker-1](https://onedrive.live.com?cid=c177b401a2934353&id=C177B401A2934353!s6e2bb7fee01b4cb4ac0f382b745f84a0)

[There are multiple factors that affect my personal decision for joining a group of teaching or tutoring, or a peer group for study, First off is the number of people. Definitely how many they are because I generally get uncomfortable learning from a student himself in a mob of at least 10-15 people with everyone having his own liberty to speak and no one is there to stop them and everyone having it's more of a chaos and less of a learning. Secondly, I look at the person who's teaching and look at the students, the audience, who they are. Look at their I would say the severity or I would say their concern about their studies or how they, their seriousness regarding the studies. That is what counts, because if one is not in the first in the first place one is not serious even about the studies, how can he or she be a part of such a such a group? Or how can he or she be even a teacher or a participant in this group? So these two factors matter to me and third or third factor is that it depends upon the topic too. Like if it's a topic that is easily understandable for me or that I have a lot of material on or I passed, have a grip on or I have gone through or I even have a slight idea of I will generally prefer to study it myself because I can excel in it by looking it into it myself by sort of a bit of research and the 4th factor is that that is like tangible, but that is my mood. It depends upon the mood if you are really willing to sit with people and learn, or it depends upon yourself, you yourself want to study.](https://onedrive.live.com?cid=c177b401a2934353&id=C177B401A2934353!s6e2bb7fee01b4cb4ac0f382b745f84a0)

[Speaker-2](https://onedrive.live.com?cid=c177b401a2934353&id=C177B401A2934353!s6e2bb7fee01b4cb4ac0f382b745f84a0)

[Personally, there are lot of factors that contribute if you want to join the group study session or not, it can be mental and physical as well. Because of course most of us tend to study after our battalion assemblys so](https://onedrive.live.com?cid=c177b401a2934353&id=C177B401A2934353!s6e2bb7fee01b4cb4ac0f382b745f84a0)

# Audio file

Voice 052.m4a

# Transcript

Speaker-3

Mostly I prefer studying alone, but sometimes I would say one out of five times I struggle to, you know, start the process of studying so I say that generally 3 or 4 friends we assemble in our room and we start studying. That kind of group study is not that we are teaching, we are just sitting quietly and studying our own. So, but mostly I just study alone in my room, And one of the factors is that the the closeness of my friends. I do not study with anyone mean I cannot study with anyone, just the friends whom I vibe with or whom I spend more time and but that also less so. I would say that generally I study alone, but when I am prone to procrastination about one out of five times then we just sit together and study individually.

Speaker-4

I think the only and the most important factor is exams, because I do not like doing peer studying every other day. So we only do peer studying if there is we have exams in one week or two. So I think we do studying before exam also it depends on my friends mood if they want to do it, then I also prefer it.

Speaker-5

The factor that makes me feel that I shouldn't be in a peer study is the time, because when you are studying with your friends, you are stuck on a topic. You have to listen. The description of your every friend and in that time it's better if you take that kind of lecture or topic from Internet because you get a more kind of knowledge than being compared to that limited era of knowledge which you get from your friends. And so this time limit makes me feel that I should study on myself then in a group study. But to some subjects like for anatomy I prefer that I should learn it by calling with some friends.

Speaker-6

I usually prefer sitting alone in a focused environment, but if I have to study in a group, I try to choose a group in which there are few people like two to three people and they are as serious about studying as me.

# Audio file

[Voice 053.m4a](https://onedrive.live.com?cid=c177b401a2934353&id=C177B401A2934353!sb9c08477d8204ae484de08bea87e6094)

# [Transcript](https://onedrive.live.com?cid=c177b401a2934353&id=C177B401A2934353!sb9c08477d8204ae484de08bea87e6094)

**[Interviewer](https://onedrive.live.com?cid=c177b401a2934353&id=C177B401A2934353!sb9c08477d8204ae484de08bea87e6094)**

**[What factors affect your decision to leave a group?](https://onedrive.live.com?cid=c177b401a2934353&id=C177B401A2934353!sb9c08477d8204ae484de08bea87e6094)**

[Speaker-1](https://onedrive.live.com?cid=c177b401a2934353&id=C177B401A2934353!sb9c08477d8204ae484de08bea87e6094)

[First off, we generally leave a group when they lose their interest in studies or when the number of people either deteriorate or increase and the third is that when you don't really think you know you any longer need to study group, you have changed the way you study the modalities of your own study and you prefer to self study.](https://onedrive.live.com?cid=c177b401a2934353&id=C177B401A2934353!sb9c08477d8204ae484de08bea87e6094)

[Speaker-2](https://onedrive.live.com?cid=c177b401a2934353&id=C177B401A2934353!sb9c08477d8204ae484de08bea87e6094)

[Usually it depends upon the company with which you're studying. Sometimes all of us are serious. It depends upon the time of the year, if of course, if it's the time near our exams, then of course all of us are serious and no one tends to leave the group. But if you know we are studying just for routine, there will be one or two cadets, who who you know try to listen to some music or, you know, crack some jokes or motivates you to leave the group.](https://onedrive.live.com?cid=c177b401a2934353&id=C177B401A2934353!sb9c08477d8204ae484de08bea87e6094)

[Speaker-3](https://onedrive.live.com?cid=c177b401a2934353&id=C177B401A2934353!sb9c08477d8204ae484de08bea87e6094)

[It usually is just a question of how till when the group is starting to get detracted and generally when when we are serious for studies we do not get detracted. But most of the time I prefer studying alone and when someone starts talking about some other thing in the group so we generally leave and dissipate. Also, I feel that someone is a fast learner and some people are slow learners like me. So that really compels me to leave the group](https://onedrive.live.com?cid=c177b401a2934353&id=C177B401A2934353!sb9c08477d8204ae484de08bea87e6094)

[Speaker-4](https://onedrive.live.com?cid=c177b401a2934353&id=C177B401A2934353!sb9c08477d8204ae484de08bea87e6094)

[Ma'am, I think if the other partners are, if they are not serious, if they don't want to study, then I usually study, I usually prefer studying alone. So it all depends on priorities. If your priorities do not match with any any of your friend or they do not, they don't want to study then I don't like study.](https://onedrive.live.com?cid=c177b401a2934353&id=C177B401A2934353!sb9c08477d8204ae484de08bea87e6094)

# Audio file

[Voice 054.m4a](https://onedrive.live.com?cid=c177b401a2934353&id=C177B401A2934353!sbbecdfee98b34e25b1febe7cd3c7c08c)

# [Transcript](https://onedrive.live.com?cid=c177b401a2934353&id=C177B401A2934353!sbbecdfee98b34e25b1febe7cd3c7c08c)

[Speaker-5](https://onedrive.live.com?cid=c177b401a2934353&id=C177B401A2934353!sbbecdfee98b34e25b1febe7cd3c7c08c)

[So as I mentioned earlier that I do not generally do peer studying, but if I do I will like it would be a saturation level for me to where someone speaking for like 4 to 5 minutes maximum not more than enough because its more advantageous for me because I am the person who wants to study in loneliness and I generally speak the whole topic like I am teaching myself, so its totally depends upon the person and if I do good studying I will leave when other person cracks a joke or some other thing.](https://onedrive.live.com?cid=c177b401a2934353&id=C177B401A2934353!sbbecdfee98b34e25b1febe7cd3c7c08c) [Also in college or hostels during summer it's harsh weather and we can't sit in the garden or somewhere to study. So, its not necessary to study with peers.](https://onedrive.live.com?cid=c177b401a2934353&id=C177B401A2934353!sbbecdfee98b34e25b1febe7cd3c7c08c)

[Speaker-6 If I think the study session is not effective and if I'm not vibing with the people in the group. I just leave the group.](https://onedrive.live.com?cid=c177b401a2934353&id=C177B401A2934353!sbbecdfee98b34e25b1febe7cd3c7c08c)

Audio file

[Voice 055.m4a](https://onedrive.live.com?cid=c177b401a2934353&id=C177B401A2934353!s7496ec43829740d294001a1cc4fd0bb5)

# [Transcript](https://onedrive.live.com?cid=c177b401a2934353&id=C177B401A2934353!s7496ec43829740d294001a1cc4fd0bb5)

**[Interviewer](https://onedrive.live.com?cid=c177b401a2934353&id=C177B401A2934353!s7496ec43829740d294001a1cc4fd0bb5)**

**[Decide academic learning. What additional advantages you have obtained as a tutor or a tutee in a peer tutoring session.](https://onedrive.live.com?cid=c177b401a2934353&id=C177B401A2934353!s7496ec43829740d294001a1cc4fd0bb5)**

[Speaker-1](https://onedrive.live.com?cid=c177b401a2934353&id=C177B401A2934353!s7496ec43829740d294001a1cc4fd0bb5)

[Beside academics, the first thing is your bonding increases. You get to learn each others attitude and behavior more of, and other than that it's like you get to get new friends. That's more of it.](https://onedrive.live.com?cid=c177b401a2934353&id=C177B401A2934353!s7496ec43829740d294001a1cc4fd0bb5)

[Speaker-2](https://onedrive.live.com?cid=c177b401a2934353&id=C177B401A2934353!s7496ec43829740d294001a1cc4fd0bb5)

[You spend some quality time with your friends. It will help you vent out in a very stressful, stressful environment during the stressful studies. So it is a good way to vent out your, you know, frustrations or anything else.](https://onedrive.live.com?cid=c177b401a2934353&id=C177B401A2934353!s7496ec43829740d294001a1cc4fd0bb5)

[Speaker-3](https://onedrive.live.com?cid=c177b401a2934353&id=C177B401A2934353!s7496ec43829740d294001a1cc4fd0bb5)

[Generally, teaching other friends can improve our power of explanation, and during study sessions we get to know each other. We interact and so our bonding gets stronger.](https://onedrive.live.com?cid=c177b401a2934353&id=C177B401A2934353!s7496ec43829740d294001a1cc4fd0bb5)

[Speaker-4](https://onedrive.live.com?cid=c177b401a2934353&id=C177B401A2934353!s7496ec43829740d294001a1cc4fd0bb5)

[Ma'am, I think it first of all, it improves our bonding with our friends. And secondly, the most important one is it. It improves our confidence. Later on, if you have to give any presentation in class so we are confident that I can deliver it easily.](https://onedrive.live.com?cid=c177b401a2934353&id=C177B401A2934353!s7496ec43829740d294001a1cc4fd0bb5)

[Speaker-5](https://onedrive.live.com?cid=c177b401a2934353&id=C177B401A2934353!s7496ec43829740d294001a1cc4fd0bb5)

[So to far extent which for which time I have become a tutor for some subjects, it like clearly nourishes my the way of speaking and the way of delivering my concept to someone. And if there is some my fellow whom I am teaching some subject. So it will like the topic which I am teaching to that person I will get so good at that topic that I will not need to consult that topic next time. It will like I will get use to that topic.](https://onedrive.live.com?cid=c177b401a2934353&id=C177B401A2934353!s7496ec43829740d294001a1cc4fd0bb5)

[Speaker-6](https://onedrive.live.com?cid=c177b401a2934353&id=C177B401A2934353!s7496ec43829740d294001a1cc4fd0bb5)

[I think the advantage it has that when we are studying, we also do gossip or some other talks and it's kind of a refreshment between the study sessions as well, as long as it does not waste our time this much that it is not effective anymore.](https://onedrive.live.com?cid=c177b401a2934353&id=C177B401A2934353!s7496ec43829740d294001a1cc4fd0bb5)

# Audio file

[Voice 056.m4a](https://onedrive.live.com?cid=c177b401a2934353&id=C177B401A2934353!sdca55c967cf14d75a7f7758f530a6c48)

# [Transcript](https://onedrive.live.com?cid=c177b401a2934353&id=C177B401A2934353!sdca55c967cf14d75a7f7758f530a6c48)

**[Interviewer](https://onedrive.live.com?cid=c177b401a2934353&id=C177B401A2934353!sdca55c967cf14d75a7f7758f530a6c48)**

**[What challenges have you faced as a tutor or a tutee?](https://onedrive.live.com?cid=c177b401a2934353&id=C177B401A2934353!sdca55c967cf14d75a7f7758f530a6c48)**

[Speaker-1](https://onedrive.live.com?cid=c177b401a2934353&id=C177B401A2934353!sdca55c967cf14d75a7f7758f530a6c48)

[As a tutor, I have faced challenges of people who are in serious in their studies. First of all, taking jokes and mocking and things like that. And the second thing is that cross questioning when they question you and you are not really clear about the topic. And as a tutee I have seen that there are at times the tutor gets so self-conscious that he is more of delivering monologue and he's less concerned about the audience.](https://onedrive.live.com?cid=c177b401a2934353&id=C177B401A2934353!sdca55c967cf14d75a7f7758f530a6c48)

[Speaker-2](https://onedrive.live.com?cid=c177b401a2934353&id=C177B401A2934353!sdca55c967cf14d75a7f7758f530a6c48)

[Of course, is sometimes the unserious behavior of your fellows can is a very huge challenge, and other than that challenge that I face is that whenever I ask a question from my course mate and the other course mate would deem it as a very stupid question and, you know, it demotivates me.](https://onedrive.live.com?cid=c177b401a2934353&id=C177B401A2934353!sdca55c967cf14d75a7f7758f530a6c48)

[Speaker-3](https://onedrive.live.com?cid=c177b401a2934353&id=C177B401A2934353!sdca55c967cf14d75a7f7758f530a6c48)

[Generally. I just go for a tutor and(pause) one of the times when I was explaining some topic, the other person was not getting it that way. So I had to modify my way of explaining and but it resulted in him getting the topic so it went well and otherwise I do not face any challenges of seriousness because I generally do not indulge tutoring or tutee sessions](https://onedrive.live.com?cid=c177b401a2934353&id=C177B401A2934353!sdca55c967cf14d75a7f7758f530a6c48)

[Speaker-4](https://onedrive.live.com?cid=c177b401a2934353&id=C177B401A2934353!sdca55c967cf14d75a7f7758f530a6c48)

[Ma'am, sometimes when you ask questions from your friends so they are not listening, so they are not able to answer you, which I think it is the most big challenge.](https://onedrive.live.com?cid=c177b401a2934353&id=C177B401A2934353!sdca55c967cf14d75a7f7758f530a6c48)

[Speaker-5](https://onedrive.live.com?cid=c177b401a2934353&id=C177B401A2934353!sdca55c967cf14d75a7f7758f530a6c48)

[So generally I also become a today and that is the same thing that other person couldn't get the way I'm trying to explain, but I try to be lenient that if a person whom I am teaching if ask a stupid question, I will definitely answer that because it is the way of the teaching you don't have to be rude even for a stupid question.](https://onedrive.live.com?cid=c177b401a2934353&id=C177B401A2934353!sdca55c967cf14d75a7f7758f530a6c48)

[Speaker-6](https://onedrive.live.com?cid=c177b401a2934353&id=C177B401A2934353!sdca55c967cf14d75a7f7758f530a6c48)

[If a person asks me for help in studies and I agreed to it, and still when I'm teaching the person she is not serious and despite again and again explaining to her the topic, she is still not serious. I try to keep my calm, but eventually I get irritated.](https://onedrive.live.com?cid=c177b401a2934353&id=C177B401A2934353!sdca55c967cf14d75a7f7758f530a6c48)

Audio file

[Voice 057.m4a](https://onedrive.live.com?cid=c177b401a2934353&id=C177B401A2934353!s009d1356f9e1461596b60a762e01d5db)

# [Transcript](https://onedrive.live.com?cid=c177b401a2934353&id=C177B401A2934353!s009d1356f9e1461596b60a762e01d5db)

**[Interviewer](https://onedrive.live.com?cid=c177b401a2934353&id=C177B401A2934353!s009d1356f9e1461596b60a762e01d5db)**

**[Will you suggest a module using peer tutoring? If yes, then suggest the possibilities or outline the framework.](https://onedrive.live.com?cid=c177b401a2934353&id=C177B401A2934353!s009d1356f9e1461596b60a762e01d5db)**

[Speaker-1](https://onedrive.live.com?cid=c177b401a2934353&id=C177B401A2934353!s009d1356f9e1461596b60a762e01d5db)

[Well, I'll personally suggest it a simple no for the topics which we haven't yet covered covered. Or if it's about the topics that revision, I would say revision peer tutoring session then I can say it's yes, but it's almost a no because a student can never be like or can never replace a teacher.](https://onedrive.live.com?cid=c177b401a2934353&id=C177B401A2934353!s009d1356f9e1461596b60a762e01d5db)

[Speaker-2](https://onedrive.live.com?cid=c177b401a2934353&id=C177B401A2934353!s009d1356f9e1461596b60a762e01d5db)

[Firstly, I won't suggest it because after some time after one or two sessions the group would become unserious again. And if the other possibility is that it is improvised by senior teacher that you are, you know, studying in the groups then it will just, the spirit of group study will be lost in between.](https://onedrive.live.com?cid=c177b401a2934353&id=C177B401A2934353!s009d1356f9e1461596b60a762e01d5db)

[Speaker-3](https://onedrive.live.com?cid=c177b401a2934353&id=C177B401A2934353!s009d1356f9e1461596b60a762e01d5db)

[Personally, I am in favor of this, but generally in revision, not in some further topics. So if let's say we have done some topic and there is a session to be in which the topic is to be revised, then I think the LOs of that session should be devised and there should be an assessment of that session after words and there should be some at least some kind of monitoring of the students, maybe through cameras or something so small of small sessions like these could help.](https://onedrive.live.com?cid=c177b401a2934353&id=C177B401A2934353!s009d1356f9e1461596b60a762e01d5db)

Audio file

[Voice 058.m4a](https://onedrive.live.com?cid=c177b401a2934353&id=C177B401A2934353!s3976d66f854641f2b5cb4295c426ef75)

# [Transcript](https://onedrive.live.com?cid=c177b401a2934353&id=C177B401A2934353!s3976d66f854641f2b5cb4295c426ef75)

[Speaker-4](https://onedrive.live.com?cid=c177b401a2934353&id=C177B401A2934353!s3976d66f854641f2b5cb4295c426ef75)

[Ma'am, I will say no because I think not everybody is that serious that he or she will cover that topic at home. It can It is It can be helpful during revision lectures, I think.](https://onedrive.live.com?cid=c177b401a2934353&id=C177B401A2934353!s3976d66f854641f2b5cb4295c426ef75)

[Speaker-5](https://onedrive.live.com?cid=c177b401a2934353&id=C177B401A2934353!s3976d66f854641f2b5cb4295c426ef75)

[So my answer is also not at all, because the a student can be a good listener, a good learner, but not a good teacher because a student can't teach a class full of 200 students a full of 200 brains, he can't answer every single question because his teacher, he has spent three to four years to specialize that specific one subject, so you can't compete with that.](https://onedrive.live.com?cid=c177b401a2934353&id=C177B401A2934353!s3976d66f854641f2b5cb4295c426ef75)

[Speaker-6](https://onedrive.live.com?cid=c177b401a2934353&id=C177B401A2934353!s3976d66f854641f2b5cb4295c426ef75)

[I think that there should be these sessions just before the exams where the students can revise important topics and I do agree that there should be a supervision so that we do not waste time.](https://onedrive.live.com?cid=c177b401a2934353&id=C177B401A2934353!s3976d66f854641f2b5cb4295c426ef75)
