# Supplementary material for: Exploring Factors Affecting Informal Peer Tutoring Process Among Pre-Clinical Medical Students of a Private Medical College
Source: Research Square preprint supplement (doi:10.21203/rs.3.rs-5537207/v1), 2025-05-02
Supplement: Supplementary file 5 [file 64b07732b42bf64b69f58135.docx]

**FOCUS GROUP DISCUSSION – 4**

**Pre-clinical medical students – 1st Year MBBS**

**AM College, Rawalpindi**

**06 participants**

**9th July 2024**

# Audio file

Voice 059.m4a

# Transcript

**Interviewer**

**Can you describe a typical day of of a preclinical year in your medical program?**

P-1

So usually I wake up at very early at around 6:00 and well. And when I come to college, I usually just listen to my lectures with varying success and we don't usually have a lot of free time. So the only time I can. I'll study on my own in college is when I'm waiting for my bus, and then when I go home I usually go to sleep for the for one hour and around seven I start studying again and till 9:00 or 10:00 and then I just go to sleep at around 11.

P-2

The typical day of medical student preclinically is a very monotonous day because we wake up early in the morning around 6:00 AM, we attend various practical session and study classes involving biochemistry anatomy and Physiology. Then around 3:00 PM, we are free from our academic duties. And then reach home around 4:30 PM for me. And around 6:30, I sleep and wake up. Then I fall back asleep around 12.

P-3

On days when we don't have any tests or other jobs to do, then that those are like free days. So we just wake up, attend classes, all the lectures, go home and most of the times, not even open a work. But on other days when we have certain exams or maybe some presentations or things, then we go home. And that is when we have to study and make out some time for studying the topics or if we have an upcoming test or something. Otherwise it's all the same every day, just waking up like an alarm clock and justice doing all the things.

P-4

Our call it starts at 8:00, but we have to be here by 7:30 for the fall in and after that the classes begin. We get off from college at 3:00. But I reach home by 4:30, almost. And by then I am too exhausted to do any study so I just change my clothes, have my lunch and go to sleep for 40 to. 45 minutes at night at sleep by 10:00 PM so I only have three hours in between. That is 6 to 9 and that is when I have to cope up with my studies to my home chores task and some games or sports if I get the time for that.

P-5

So a typical day in my preclinical year, it starts with the basic sciences that we study like anatomy, Physiology, biochemistry. And then in the, then we attend the practical sessions where we do hands on experiments. Then the evening is reserved for some self study and then just review the next day material and this goes on

P-6

Yes our routine is extremely exhausting we go to college at 7:30 and then remain there till three. We have back-to-back lectures there we reach home at around 3:30 PM and then I take some rest till 5:00 to 5:30, then start studying. If we have a test the next day. If we don't, I do study, but not that seriously. I then sleep at around 11:00 PM.

# Audio file

[Voice 060.m4a](https://onedrive.live.com?cid=c177b401a2934353&id=C177B401A2934353!s160d263ff27445b497a486d817af53b1)

# [Transcript](https://onedrive.live.com?cid=c177b401a2934353&id=C177B401A2934353!s160d263ff27445b497a486d817af53b1)

**[Interviewer](https://onedrive.live.com?cid=c177b401a2934353&id=C177B401A2934353!s160d263ff27445b497a486d817af53b1)**

**[How do you explain the role of a student in teaching and learning as a teacher?](https://onedrive.live.com?cid=c177b401a2934353&id=C177B401A2934353!s160d263ff27445b497a486d817af53b1)**

[Participant 1](https://onedrive.live.com?cid=c177b401a2934353&id=C177B401A2934353!s160d263ff27445b497a486d817af53b1)

[So basically, as students learn, learn learning is basically that we should, you know, do our best to pay attention to the lectures as much as we can, and to explore the topics on our own through the Internet and stuff and in our role in teaching is basically that so if our peers are struggling with something, we have to help them. And if someone asks us for our help, we should help them. And if we find something that we have that we feel like we should share, then we should share with it with others.](https://onedrive.live.com?cid=c177b401a2934353&id=C177B401A2934353!s160d263ff27445b497a486d817af53b1)

[Participant 2](https://onedrive.live.com?cid=c177b401a2934353&id=C177B401A2934353!s160d263ff27445b497a486d817af53b1)

[Most important role of a student teacher is to facilitate sharing of knowledge, encourage discussion and promote active learning. And as a student, it is very important for us to promote such activities because it reinforces our concepts as well.](https://onedrive.live.com?cid=c177b401a2934353&id=C177B401A2934353!s160d263ff27445b497a486d817af53b1)

[Participant 3](https://onedrive.live.com?cid=c177b401a2934353&id=C177B401A2934353!s160d263ff27445b497a486d817af53b1)

[So about role of a student in teaching and learning as a teacher. What I believe is that it helps us to bond with those around us because we're all doing the same thing, studying the same thing. So when we focus, focus more about teaching it out, that actually not only reinforces our concepts, but also helps us help the people around us and bond with them and alongside when we study something and when we attend a lecture and listen to it. That help helps us retain it. But when we teach it to someone and when we teach it to ourselves, that is when we can make sure we're not going to forget the concept ever in the long run. So that really helps.](https://onedrive.live.com?cid=c177b401a2934353&id=C177B401A2934353!s160d263ff27445b497a486d817af53b1)

[Participant 4](https://onedrive.live.com?cid=c177b401a2934353&id=C177B401A2934353!s160d263ff27445b497a486d817af53b1)

[I've realized that I learn things better when I study them myself and then discuss them with. As well. In fact, even when I'm preparing for my exams, I read everything out loud, as if I'm teaching myself, because in that way, multiple of our senses are involved and they get integrated. And then also when you yourself and the teacher, as well as the student, your brain is actually working more efficiently as it creates some questions and then generates the answers for them as well. So that's more proactive.](https://onedrive.live.com?cid=c177b401a2934353&id=C177B401A2934353!s160d263ff27445b497a486d817af53b1)

[Participants 5](https://onedrive.live.com?cid=c177b401a2934353&id=C177B401A2934353!s160d263ff27445b497a486d817af53b1)

[OK, so as a student I think my role in teaching and learning involves both absorbing new information and sharing knowledge with the peers. So by participating in Group studies and the peer, peer tutoring sessions, I help others understand the difficult concepts and while reinforcing my own understanding. So acting as a teacher helps me improve my communication skills and also deepen my grasp on this subject matter.](https://onedrive.live.com?cid=c177b401a2934353&id=C177B401A2934353!s160d263ff27445b497a486d817af53b1)

[Participant 6](https://onedrive.live.com?cid=c177b401a2934353&id=C177B401A2934353!s160d263ff27445b497a486d817af53b1)

[When a student knows that he or she has to teach a particular topic, he studies it with more enthusiasm and gains more information to answer the questions of others, thus making his own concepts clearer.](https://onedrive.live.com?cid=c177b401a2934353&id=C177B401A2934353!s160d263ff27445b497a486d817af53b1)

# Audio file

[Voice 061.m4a](https://onedrive.live.com?cid=c177b401a2934353&id=C177B401A2934353!s1e1e4e3e287a4819aaf5cf1a3b92fda0)

# [Transcript](https://onedrive.live.com?cid=c177b401a2934353&id=C177B401A2934353!s1e1e4e3e287a4819aaf5cf1a3b92fda0)

**[Interviewer](https://onedrive.live.com?cid=c177b401a2934353&id=C177B401A2934353!s1e1e4e3e287a4819aaf5cf1a3b92fda0)**

**[How do you plan and execute your peer tutoring process? Like how do you start arrange a group, manage your time, and who decides who's going to be the tutor and who's going to be the tutee?](https://onedrive.live.com?cid=c177b401a2934353&id=C177B401A2934353!s1e1e4e3e287a4819aaf5cf1a3b92fda0)**

[P-1](https://onedrive.live.com?cid=c177b401a2934353&id=C177B401A2934353!s1e1e4e3e287a4819aaf5cf1a3b92fda0)

[OK, so basically I don't usually plan this thing. Usually when I just encounter some people discussing something, I just join them and or if someone asks for my help then I decide give i will that I will help them, but if I'm if I just join the discussion, then whoever is just teaching, I will just listen to them.](https://onedrive.live.com?cid=c177b401a2934353&id=C177B401A2934353!s1e1e4e3e287a4819aaf5cf1a3b92fda0)

[P- 2](https://onedrive.live.com?cid=c177b401a2934353&id=C177B401A2934353!s1e1e4e3e287a4819aaf5cf1a3b92fda0)

[So decision regarding being a tutor and tutee depends upon who is well versed in a particular topic. So the tutor is going to go through a certain topic superficially, identify the key points, highlight the important materials, and convey that to his peers in an interactive manner that helps them reinforce that knowledge in a better way.](https://onedrive.live.com?cid=c177b401a2934353&id=C177B401A2934353!s1e1e4e3e287a4819aaf5cf1a3b92fda0)

[P-3](https://onedrive.live.com?cid=c177b401a2934353&id=C177B401A2934353!s1e1e4e3e287a4819aaf5cf1a3b92fda0)

[I like planning my sessions beforehand, so most of the times I already know who my gonna sit and study with, sometimes through mobile, maybe WhatsApp or a call. And if we're in college then we plan it ahead, like maybe in the breaks or the free time we've got in that time we will study. So how I arrange it and how I work with it is. I go better with teaching people stuff more than listening them teach me things, so I like to study a topic and then make small notes regarding it and then teach it to someone so that someone most of the times is my friends and we plan it before hand that in this time we're going to do this topic.](https://onedrive.live.com?cid=c177b401a2934353&id=C177B401A2934353!s1e1e4e3e287a4819aaf5cf1a3b92fda0)

[P-4](https://onedrive.live.com?cid=c177b401a2934353&id=C177B401A2934353!s1e1e4e3e287a4819aaf5cf1a3b92fda0)

[I usually don't plant peer tutoring because I prefer studying by myself first rather than just listening passively to someone speak. So for me, peer tutoring usually happens a few hours before the exam when me and my friends, we don't have enough time to cover the entire syllabus. So we just discuss the topics in which we have any ambiguities with each other at this spot. As far as being the tutor and tutee is concerned. So whoever has a better grasp of the topic, he becomes a tutor. And whoever wants to learn a topic, he becomes a tutee. So for me it's just a spontaneous and need-based process rather than a pre planned one.](https://onedrive.live.com?cid=c177b401a2934353&id=C177B401A2934353!s1e1e4e3e287a4819aaf5cf1a3b92fda0)

[P-5](https://onedrive.live.com?cid=c177b401a2934353&id=C177B401A2934353!s1e1e4e3e287a4819aaf5cf1a3b92fda0)

[OK. So we don't usually arrange the sessions. Whoever is studying a hard topic, we just come together and study it and I incorporate the peer tutoring into my schedule, ensuring that it aligns with my study timetable so that it complements rather than it competes with my studies. And who is the role of the tutor and tutee depends on who has the better grasp on the topic whoever has he acts as a tutor.](https://onedrive.live.com?cid=c177b401a2934353&id=C177B401A2934353!s1e1e4e3e287a4819aaf5cf1a3b92fda0)

[P-6](https://onedrive.live.com?cid=c177b401a2934353&id=C177B401A2934353!s1e1e4e3e287a4819aaf5cf1a3b92fda0)

[For me, the peer tutoring process comes into play during exams, so we basically plan it by coming to college earlier and going to our specific location that does not have a lot of disturbance and starts reading after discussing what we have not done mutually and the by conducting peer tutoring in breaks or whenever we are free, we actually manage the time so regarding who becomes a tutor and who becomes a tutee So the one who knows the topic becomes a tutor and the one who doesn't becomes a tutee.](https://onedrive.live.com?cid=c177b401a2934353&id=C177B401A2934353!s1e1e4e3e287a4819aaf5cf1a3b92fda0)

# Audio file

[Voice 062.m4a](https://onedrive.live.com?cid=c177b401a2934353&id=C177B401A2934353!s646c64750d1b4fae82988252074ebeac)

# [Transcript](https://onedrive.live.com?cid=c177b401a2934353&id=C177B401A2934353!s646c64750d1b4fae82988252074ebeac)

**[Interviewer](https://onedrive.live.com?cid=c177b401a2934353&id=C177B401A2934353!s646c64750d1b4fae82988252074ebeac)**

**[What factors affect your decision to join or participate in a group of peer tutoring?](https://onedrive.live.com?cid=c177b401a2934353&id=C177B401A2934353!s646c64750d1b4fae82988252074ebeac)**

[P-1](https://onedrive.live.com?cid=c177b401a2934353&id=C177B401A2934353!s646c64750d1b4fae82988252074ebeac)

[It basically depends on whether I know the, when I know the people who are you know, studying together or how how well I know them. And if that the topic they are discussing is actually something I want to learn.](https://onedrive.live.com?cid=c177b401a2934353&id=C177B401A2934353!s646c64750d1b4fae82988252074ebeac) [So one of the major factors that enable me to go for peer tutoring is that we all as students have shared academic goals, so we know that a certain topic is going to help us for our academic studies.](https://onedrive.live.com?cid=c177b401a2934353&id=C177B401A2934353!s646c64750d1b4fae82988252074ebeac)

[P-2](https://onedrive.live.com?cid=c177b401a2934353&id=C177B401A2934353!s646c64750d1b4fae82988252074ebeac)

[So one of the major factor that enables me to go for peer tutoring is that we all as students have shared academic goals, so we know that a certain topic is going to help us for our academic studies. Secondly, it encourages active learning and it promotes discussion amongst peers because in a teacher and student relationship one is dominant and the other is subservient. So there is a barrier of professionalism between the teacher and the student. But in peer tutoring we're all at the same level. We can debate, contemplate and discuss certain topics at a deeper depth and it helps reinforces concepts.](https://onedrive.live.com?cid=c177b401a2934353&id=C177B401A2934353!s646c64750d1b4fae82988252074ebeac)

[P-3](https://onedrive.live.com?cid=c177b401a2934353&id=C177B401A2934353!s646c64750d1b4fae82988252074ebeac)

[So I like to think about how well I know the other person and also that that level of comfort that I'll be sure of, the fact they're not going to judge me and I'll be able to explain it to them, to the level at which they can understand and to the level at which I have understood the concept in the 1st place myself and apart from that another factor. That is, there is that both the party should be getting benefited from it. It's not just always one person may be them or me, [urdu language]but like it has to help me as well as helping them. So that is something I look forward to.](https://onedrive.live.com?cid=c177b401a2934353&id=C177B401A2934353!s646c64750d1b4fae82988252074ebeac)

[P-4](https://onedrive.live.com?cid=c177b401a2934353&id=C177B401A2934353!s646c64750d1b4fae82988252074ebeac)

[I feel like a student understands the difficulties faced by fellow student better as compared to a teacher, so he or she can explain a particular topic in a much easier and simpler way as compared to of course a PG teacher right? And moreover, we are usually hesitant to ask questions from a teacher due to the fear of being judged or getting embarrassed in front of the whole class, whereas on the other hand we can ask anything from a fellows because we don't have any senior junior relationship or any barrier between us, right? So that thing really encourages me to join peer tutoring.](https://onedrive.live.com?cid=c177b401a2934353&id=C177B401A2934353!s646c64750d1b4fae82988252074ebeac)

[P-5](https://onedrive.live.com?cid=c177b401a2934353&id=C177B401A2934353!s646c64750d1b4fae82988252074ebeac)

[So my decision is influenced by my friendships and the comfort level that I have with my peers.](https://onedrive.live.com?cid=c177b401a2934353&id=C177B401A2934353!s646c64750d1b4fae82988252074ebeac)

[P-6](https://onedrive.live.com?cid=c177b401a2934353&id=C177B401A2934353!s646c64750d1b4fae82988252074ebeac)

[So #1, if I don't know the topic, I definitely join peer tutoring group and #2 the fact that teaching that there is enhances my knowledge and helps me retain already learn stuff in a better way.](https://onedrive.live.com?cid=c177b401a2934353&id=C177B401A2934353!s646c64750d1b4fae82988252074ebeac)

# Audio file

[Voice 063.m4a](https://onedrive.live.com?cid=c177b401a2934353&id=C177B401A2934353!se3ab54c876c945dfa4eb06dfb952a193)

# [Transcript](https://onedrive.live.com?cid=c177b401a2934353&id=C177B401A2934353!se3ab54c876c945dfa4eb06dfb952a193)

**[Interviewer](https://onedrive.live.com?cid=c177b401a2934353&id=C177B401A2934353!se3ab54c876c945dfa4eb06dfb952a193)**

**[What factors affect your decision to leave a group?](https://onedrive.live.com?cid=c177b401a2934353&id=C177B401A2934353!se3ab54c876c945dfa4eb06dfb952a193)**

[P-1](https://onedrive.live.com?cid=c177b401a2934353&id=C177B401A2934353!se3ab54c876c945dfa4eb06dfb952a193)

[OK, so for me it is like it is when I'm not interested in the topic or if I feel like the discussion is not benefiting me on academically, then I just leave the group or if the if I just feel like I cannot like discuss with properly with the with those people.](https://onedrive.live.com?cid=c177b401a2934353&id=C177B401A2934353!se3ab54c876c945dfa4eb06dfb952a193)

[P-2](https://onedrive.live.com?cid=c177b401a2934353&id=C177B401A2934353!se3ab54c876c945dfa4eb06dfb952a193)

[So one of the major factors that can enable a person to leave a peer tutoring group is incompatible learning styles that different students and peers have different learning styles. So not every learning style is compatible for the other, secondly, lack of commitment. Most people are just there for the fun of it, to interact with others, so lack of commitment affects the others who are serious about the peer tutoring session, and secondly, that many students have a different learning style, so they have divergent academic abilities. So that is when something becomes a hinderance.](https://onedrive.live.com?cid=c177b401a2934353&id=C177B401A2934353!se3ab54c876c945dfa4eb06dfb952a193)

[P-3](https://onedrive.live.com?cid=c177b401a2934353&id=C177B401A2934353!se3ab54c876c945dfa4eb06dfb952a193)

[So when I begin to think that this is not fitting in my schedule and I'm unable to do my things in my studying, managing it along with the peer tutoring, then that is when I decide to leave. And secondly, when I see that the other person is not as serious with it as I am, because when I decide to do a topic with someone that is me doing it for the final time, I'm not going to revise it again, so that is something that has to be serious for me. If it is not serious for them then I cannot carry on with it.](https://onedrive.live.com?cid=c177b401a2934353&id=C177B401A2934353!se3ab54c876c945dfa4eb06dfb952a193)

[P-4](https://onedrive.live.com?cid=c177b401a2934353&id=C177B401A2934353!se3ab54c876c945dfa4eb06dfb952a193)

[So whenever we get together for a group study or peer tutoring, we usually end up wasting more time on the unimportant stuff and get detracted. Moreover, sometimes you just want to have a me time like where you want to focus on yourself or the topic in which you find difficulty, and that especially matters when you're already short on time, right? And you can't have that in peer peer tutoring, you have to listen to everyone, even if you don't want to. So that is when I decide to leave and study at my own.](https://onedrive.live.com?cid=c177b401a2934353&id=C177B401A2934353!se3ab54c876c945dfa4eb06dfb952a193)

[P-5](https://onedrive.live.com?cid=c177b401a2934353&id=C177B401A2934353!se3ab54c876c945dfa4eb06dfb952a193)

[So difference in learning styles, lack of progress, and if I feel that my study needs are not being met in a group, then I decide to leave that.](https://onedrive.live.com?cid=c177b401a2934353&id=C177B401A2934353!se3ab54c876c945dfa4eb06dfb952a193)

[P-6](https://onedrive.live.com?cid=c177b401a2934353&id=C177B401A2934353!se3ab54c876c945dfa4eb06dfb952a193)

[I decide to leave if number one. I cannot keep up with the pace at which they are studying #2 if they are not revising or related the topics studied #3 if they are doing something I have already done.](https://onedrive.live.com?cid=c177b401a2934353&id=C177B401A2934353!se3ab54c876c945dfa4eb06dfb952a193) [Another important thing is that for me, it's the non-serious attitude of my peers because of course, if they're not standing by themselves, how will they teach me? So that really is a mood killer. And that makes me leave the group](https://onedrive.live.com?cid=c177b401a2934353&id=C177B401A2934353!se3ab54c876c945dfa4eb06dfb952a193)

# Audio file

[Voice 064 1.m4a](https://onedrive.live.com?cid=c177b401a2934353&id=C177B401A2934353!sbe72e1b0fbfb4410aff68bc2ff0a0a6f)

# [Transcript](https://onedrive.live.com?cid=c177b401a2934353&id=C177B401A2934353!sbe72e1b0fbfb4410aff68bc2ff0a0a6f)

**[Interviewer](https://onedrive.live.com?cid=c177b401a2934353&id=C177B401A2934353!sbe72e1b0fbfb4410aff68bc2ff0a0a6f)**

**[Besides academic learning, what additional advantages have you obtained as a tutor or tutee through informal peer tutoring?](https://onedrive.live.com?cid=c177b401a2934353&id=C177B401A2934353!sbe72e1b0fbfb4410aff68bc2ff0a0a6f)**

[P-1](https://onedrive.live.com?cid=c177b401a2934353&id=C177B401A2934353!sbe72e1b0fbfb4410aff68bc2ff0a0a6f)

[OK, so when I'm teaching I've learned how to communicate better with people and basically how to get my point across in a concise manner in a way that most people can understand and to put myself on the same level as the other person. And when I'm learning and when I'm learning from someone, I just I have learned to listen to people more and to pay attention, like actually pay attention to the whatever they're saying.](https://onedrive.live.com?cid=c177b401a2934353&id=C177B401A2934353!sbe72e1b0fbfb4410aff68bc2ff0a0a6f)

[P-2](https://onedrive.live.com?cid=c177b401a2934353&id=C177B401A2934353!sbe72e1b0fbfb4410aff68bc2ff0a0a6f)

[So additional benefits of peer tutoring are enhanced communication skills. Many people are introverted and do not talk as much in real life, but through peer tutoring they can enhance their communication skills, express themselves better, and some people who are loners did not have much social skills and social relations. They have better social relations through peer tutoring.](https://onedrive.live.com?cid=c177b401a2934353&id=C177B401A2934353!sbe72e1b0fbfb4410aff68bc2ff0a0a6f)

[P-3](https://onedrive.live.com?cid=c177b401a2934353&id=C177B401A2934353!sbe72e1b0fbfb4410aff68bc2ff0a0a6f)

[So an additional advantage, apart from the academics, is that it allows me to bond with people and to connect to them because somebody you are going to help, or maybe somebody who's going to help you, you will definitely share a different kind of bond with them apart from other colleagues. And one more thing that during the exam session and during this stress period so. We're constantly studying with our own books, with our own, at our own pace, with our own time, and that gets hectic and that gets stressful. So taking some time out and just conversing with a friend, maybe just teaching them something that could, you know, help you come out of that, that circle you’re in during the exam time, so that really helps.](https://onedrive.live.com?cid=c177b401a2934353&id=C177B401A2934353!sbe72e1b0fbfb4410aff68bc2ff0a0a6f)

[P-4](https://onedrive.live.com?cid=c177b401a2934353&id=C177B401A2934353!sbe72e1b0fbfb4410aff68bc2ff0a0a6f)

[Besides academic learning, I have developed patience, team work, communication skills and plus you also develop a good good bonding with your peers too when you're working together.](https://onedrive.live.com?cid=c177b401a2934353&id=C177B401A2934353!sbe72e1b0fbfb4410aff68bc2ff0a0a6f)

[P-5](https://onedrive.live.com?cid=c177b401a2934353&id=C177B401A2934353!sbe72e1b0fbfb4410aff68bc2ff0a0a6f)

[So I have improved my communications skills and it has also helped me to strengthen my relationship with my peers and it has enhanced my ability to work collaboratively with different people.](https://onedrive.live.com?cid=c177b401a2934353&id=C177B401A2934353!sbe72e1b0fbfb4410aff68bc2ff0a0a6f)

[P-6](https://onedrive.live.com?cid=c177b401a2934353&id=C177B401A2934353!sbe72e1b0fbfb4410aff68bc2ff0a0a6f)

[So when I'm a tutor, one advantage is the respect of others definitely, and the benefit of gaining a good deed and improving my communication skills.](https://onedrive.live.com?cid=c177b401a2934353&id=C177B401A2934353!sbe72e1b0fbfb4410aff68bc2ff0a0a6f)

Audio file

[Voice 065.m4a](https://onedrive.live.com?cid=c177b401a2934353&id=C177B401A2934353!s7e12e289ba5f416984c48b95ba6bae1a)

# [Transcript](https://onedrive.live.com?cid=c177b401a2934353&id=C177B401A2934353!s7e12e289ba5f416984c48b95ba6bae1a)

**[Interviewer](https://onedrive.live.com?cid=c177b401a2934353&id=C177B401A2934353!s7e12e289ba5f416984c48b95ba6bae1a)**

**[What challenges have you faced as a tutor and tutee during an informal peer tutoring session?](https://onedrive.live.com?cid=c177b401a2934353&id=C177B401A2934353!s7e12e289ba5f416984c48b95ba6bae1a)**

**[P-1](https://onedrive.live.com?cid=c177b401a2934353&id=C177B401A2934353!s7e12e289ba5f416984c48b95ba6bae1a)**

[OK, so I used to be the kind of person who would just talk about others and I would not properly listen so while I was learning from them, I had to like, overcome this problem of mine and to basically learn how to listen to people. This was one thing and another was that I. I will was not a very patient person so then, so teaching other people and when they are not understanding, even though I'm explaining it for the third, fourth time I used to get very short tempered with them. But I feel like I've overcome that a bit.](https://onedrive.live.com?cid=c177b401a2934353&id=C177B401A2934353!s7e12e289ba5f416984c48b95ba6bae1a)

[P-2](https://onedrive.live.com?cid=c177b401a2934353&id=C177B401A2934353!s7e12e289ba5f416984c48b95ba6bae1a)

[So the challenge is that one phase in peer tutoring is that everyone has different learning paces, so managing everyone's learning pace is different. Maintaining motivation in a peer tutoring session because it can often get exhausting. And lastly, balancing tutoring with our personal academic goals is a bit tough.](https://onedrive.live.com?cid=c177b401a2934353&id=C177B401A2934353!s7e12e289ba5f416984c48b95ba6bae1a)

[P-3](https://onedrive.live.com?cid=c177b401a2934353&id=C177B401A2934353!s7e12e289ba5f416984c48b95ba6bae1a)

[So I have a very short attention spam like very short attention spam. So whenever we're in Group studying. I tend to get defocused and like distracted from the main topic. Therefore I do not do good being a tutee but to teach someone that is good but that also when the other person is not committing to it and they are not serious. And secondly I also feel that when it's a it's a teacher and the student they have a commitment to make the student understand the concept, but with with our own colleagues, we do not have it. But it is like a moral commitment. Yeah, morally you are bound to explain it to them even if they don't understand it. And that gets frustrating at times, and it also wastes a bit of time. So.](https://onedrive.live.com?cid=c177b401a2934353&id=C177B401A2934353!s7e12e289ba5f416984c48b95ba6bae1a)

[P-4](https://onedrive.live.com?cid=c177b401a2934353&id=C177B401A2934353!s7e12e289ba5f416984c48b95ba6bae1a)

[Mostly I'm a tutor and it gets really frustrating when I'm speaking, but certain people they start interrupting or multiple people they start speaking at the same time and then secondly, since we are student ourselves, so we have a limited knowledge and we are unable to answer a question or completely clear out any queries that we might have. So these factors can be a bit challenging during peer tutoring.](https://onedrive.live.com?cid=c177b401a2934353&id=C177B401A2934353!s7e12e289ba5f416984c48b95ba6bae1a)

[P-5](https://onedrive.live.com?cid=c177b401a2934353&id=C177B401A2934353!s7e12e289ba5f416984c48b95ba6bae1a)

[So the challenges include that ensuring that all members are equally engaged and sometimes dealing with varying levels of understanding among group members, it is very difficult and it is also difficult to balance your own personal study time with the tutoring time.](https://onedrive.live.com?cid=c177b401a2934353&id=C177B401A2934353!s7e12e289ba5f416984c48b95ba6bae1a)

[P-6](https://onedrive.live.com?cid=c177b401a2934353&id=C177B401A2934353!s7e12e289ba5f416984c48b95ba6bae1a)

[So as a tutor, I find it a bit irritating if I have to teach the topic and again and again whenever someone joins already going on discussion and as a tutee if I don't understand something, I cannot ask the one teaching more than one time because I think that I'm already a burden on them.](https://onedrive.live.com?cid=c177b401a2934353&id=C177B401A2934353!s7e12e289ba5f416984c48b95ba6bae1a)

# Audio file

[Voice 066.m4a](https://onedrive.live.com?cid=c177b401a2934353&id=C177B401A2934353!s14a185f3e2384f348c8b05759f573ca9)

# [Transcript](https://onedrive.live.com?cid=c177b401a2934353&id=C177B401A2934353!s14a185f3e2384f348c8b05759f573ca9)

**[Interview](https://onedrive.live.com?cid=c177b401a2934353&id=C177B401A2934353!s14a185f3e2384f348c8b05759f573ca9)**

**[Will you suggest a module using peer tutoring? If yes, then what possibilities or outline a framework using the peer tutoring model.](https://onedrive.live.com?cid=c177b401a2934353&id=C177B401A2934353!s14a185f3e2384f348c8b05759f573ca9)**

[P-1](https://onedrive.live.com?cid=c177b401a2934353&id=C177B401A2934353!s14a185f3e2384f348c8b05759f573ca9)

[OK, so for module peer tutoring plan I would basically suggest it is beneficial if you can surround yourself with people who are willing to study because throughout the year not everyone has the same commitment, same work ethic as you. So if you can surround yourself with people who are willing to put in their effort, then it is a good thing. If not, then basically you're just wasting your time.](https://onedrive.live.com?cid=c177b401a2934353&id=C177B401A2934353!s14a185f3e2384f348c8b05759f573ca9)

[Interviewer](https://onedrive.live.com?cid=c177b401a2934353&id=C177B401A2934353!s14a185f3e2384f348c8b05759f573ca9)

[So you do you want an institution to give you time for a formal peer tutoring or you want to keep it informal with your friends?](https://onedrive.live.com?cid=c177b401a2934353&id=C177B401A2934353!s14a185f3e2384f348c8b05759f573ca9)

[P-1](https://onedrive.live.com?cid=c177b401a2934353&id=C177B401A2934353!s14a185f3e2384f348c8b05759f573ca9)

[Informal, informal.](https://onedrive.live.com?cid=c177b401a2934353&id=C177B401A2934353!s14a185f3e2384f348c8b05759f573ca9)

[P-2](https://onedrive.live.com?cid=c177b401a2934353&id=C177B401A2934353!s14a185f3e2384f348c8b05759f573ca9)

[I would say no, because there are two main reasons for it #1 the only reason we go for peer tutoring is before the exams when we have a certain academic pressure, we have certain obligations to reach our academic goal. But while we do not have that pressure, we often do not study at all, even though we do have free sessions in our class, when sometimes the teacher is absent, but we do not study, we just play talk amongst ourselves. So without that particular pressure that you have to do a certain thing to meet a certain goal or reach a certain stage, I don't think this can be successful unless the person is really dedicated, but that's highly unlikely.](https://onedrive.live.com?cid=c177b401a2934353&id=C177B401A2934353!s14a185f3e2384f348c8b05759f573ca9)

[P-3](https://onedrive.live.com?cid=c177b401a2934353&id=C177B401A2934353!s14a185f3e2384f348c8b05759f573ca9)

[I think it would be helpful only if it would to be planned in a way and how I see it is that if we could basically allocate a student who's struggling with the student who's good at, you know, vocalizing their concepts, and then we pair them up together and through the entire module, they'll have certain slots. Where they where one where one of them is going to teach the other person, so they'll be able to bond in that time when they're not in the stress of exams, and then when they come close to the exams, that is when informal sessions as well as formal sessions, because that is when everybody tends to get serious. So the at that time, they'll have that level of confidence and also for the student who's going to be teaching them. He would have taught them the basic concepts so that in the exam just right before the exam, they can just put on on those concepts. And not having to start from scratch again. So that is going to be helpful if it is planned accordingly.](https://onedrive.live.com?cid=c177b401a2934353&id=C177B401A2934353!s14a185f3e2384f348c8b05759f573ca9)

[P-4](https://onedrive.live.com?cid=c177b401a2934353&id=C177B401A2934353!s14a185f3e2384f348c8b05759f573ca9)

[I would second P2 here that no I want because I'm more comfortable with my spontaneous informal session because it allows me the liberty to join only if I want to. Like nobody is imposing it on me deliberately.](https://onedrive.live.com?cid=c177b401a2934353&id=C177B401A2934353!s14a185f3e2384f348c8b05759f573ca9)

[P-5](https://onedrive.live.com?cid=c177b401a2934353&id=C177B401A2934353!s14a185f3e2384f348c8b05759f573ca9)

[No, because I think no, because we are only doing it just before the exams and I can't remember anything which is told at the last hour I because I need to study it earlier. Even if i have to suggest so, I will suggest CNS and ANS module because it was such a lengthy module as there was so much sulci and gyri and all that. So, the method that I will suggest is, first of all, I'll ask everyone to organize study material and the models from the labs](https://onedrive.live.com?cid=c177b401a2934353&id=C177B401A2934353!s14a185f3e2384f348c8b05759f573ca9)

[p-6](https://onedrive.live.com?cid=c177b401a2934353&id=C177B401A2934353!s14a185f3e2384f348c8b05759f573ca9)

[Definitely No, as I'm sure I, along with many others won't be serious unless there is an exam.](https://onedrive.live.com?cid=c177b401a2934353&id=C177B401A2934353!s14a185f3e2384f348c8b05759f573ca9)
