# Supplementary material for: Exploring Factors Affecting Informal Peer Tutoring Process Among Pre-Clinical Medical Students of a Private Medical College
Source: Research Square preprint supplement (doi:10.21203/rs.3.rs-5537207/v1), 2025-05-02
Supplement: Supplementary file 6 [file 6f8ab73c1231362c00c5eaae.docx]

**Arrangement of Informal Peer Tutoring Process**

**Emerging Themes and Sub-themes:**

- Tutor/ Tutee Selection - Knowledge-based Learning,

and she has good concepts, she is a stronger in anatomy, my peers should be knowledgeable about the subject that they're teaching, which topic is whose strength, who knows what topic the best, some person knows more subjects, roles based on like. Who is like stronger in which subject and who needs their help, at least have some background knowledge, check the confidence, who's going to be the tutor and tutee by asking around who understood the topic the best from the teacher and who has a better understanding of it, to facilitate sharing of knowledge, encourage discussion and promote active learning, who is well versed,

Amicable Relationship

that my friends know me very well, more friendly manner, Good friends and our batch is also same, Friends yeah because it's enjoyable and effective as well, and they can better teach you the tactics and the skills being at your level and you can also be quite frank with them, the student who is acting as a teacher should always be easygoing, always be easy to talk to, became the friends and that's how we easily just managed, find a group or a partner with which you are comfortable,

Organization of the Sessions – Initial Preparation & Spontaneous Sessions

So we arrange a group, I arranged my informal peer tutoring sessions by firstly locating an area where which is comfortable for the peer tutoring session[aa..] we decide a time because all of my friends are in different batches, So I get started peer tutoring when we have an exam or a formative system assessment, that really helps us in formative assessments and for studying for exams, It's generally a spontaneous process, so that someone most of the times is my friends and we plan it beforehand that in this time we're going to do this topic, So for me it's just a spontaneous and need-based process rather than a pre-planned one, Whoever is studying a hard topic, we just come together and study it,

**BENEFITS**

- Motivation: Academic goals & emotional and social support

One of the biggest factors for me would be motivation, being engaged and motivated, . So Motivation. Yes, it's very big factor, she just came like an Angel in my life, They know me personally so they know how I can [aa..] compell myself to study harder, social connection and strengthening all social bond and I get to understand my friends, develop a sense of entertainment, I guess in kind of teaching others, and as we all our friends, so we know the mentality of each other, he is more emotionally attached with his with his friend, it gives you a supportive learning environment, , cross questioning is a lot easier help helping us in better learning of the topic, because the bonding between the peer and the friends is much more important. because what motivates me is my peer is studying, we all have the same study style so it makes it really easier, whereas with others you have a deeper connection and the learning can be more profound, a student generally explains well because he knows the local language, he knows the body language, because all of them have spent a lot of time together and they know the pros and cons in the way of learning of each other, We interact and so our bonding gets stronger, So my decision is influenced by my friendships and the comfort level that I have with my peers.

- Personal development: cognitive and non-cognitive skills

communication skills, leadership skills, you can easily explain the complex topics and boost your confidence, being a tutor like you develop the critical thinking, habit of a good communication skills. A confidence level boost to the top, I need to grab my more knowledge about and as a tutee you develop a habit of listening as a these a tool and yeah, good listening skills, so you're going to do a better job at controlling them if you have like practice, develop a patience level to listen, you build a deeper understanding, learned time management communication skills, building the confidence to speak in a public environment, better public speaking skills, conversational skills, leadership qualities, learning how to perform as a team,[aa..] learning how to resolve conflicts in a group, learning how to talk out things or build more patience, helps me building connection and networking skills, consolidate that information, your brain is actually working more efficiently as it creates some questions and then generates the answers for them as well. So that's more proactive,

**CHALLENGES**

- Hindrance to engagement - Conflicting Time tables & Non-serious Behavior

it's a bit tough now because we are we all are dispersed now. We are different in different batches, So we have to plan about where we have to study which time we have to, but now we are in different batches. So we decided according to our daily schedule, We basically what we do is first we have to check like, who's free what time is even free, my decision to leave the group is the availability of the my classmates, lack of progress interruptions, distractions, use one of the fellows using gadget and one of start like talking about random stuff, But of course when you have when you have a exam tomorrow you you have to be serious, a timetable. Now we are in different batches, time matters a lot, the non-serious attitude of my peers, some people study better in the daytime, some people study better at the night time, coordinate our schedules different everyone has a different schedule, we just indulge in other thoughts and we start gossiping which waste a lot of time, and the conflict conflicting schedule, crack some jokes or motivates you to leave the group, I try to keep my calm,

- Students as Teachers - Learning Pace & Teaching Skills

This time the time it takes like some people have long, longer attention span. Some people have short attention span, mismatched learning, we all have different learning styles and we all have different learning pace as well, Someone is a fast learner and some people are slow learners like me, have a different level of capability, sometimes a friend is saying something will go too fast. I won't understand it, everyone has their own way of learning things, that syllabuses are huge and we have to cover in a short time. mismatch learning style, Time management and balancing tutor tutoring commitments with our personal studies, adapt his teaching style in the way that he best understands, can be a good teacher after learning from a teacher himself, the way of the teaching you don't have to be rude even for a stupid question,

**EXPECTED INSTITUTIONAL SUPPORT**

- Learning Environment – physical location & lack of resources

availability of the models, skill labs, one of the problems for college is like you can't get models, which can be a bit annoying at times because during the summers it's really hot and we don't have anywhere to sit, But sometimes we do because there is again not any sitting place where we can easily study, Maybe the area which they've selected the location is not that great and I'm not comfortable there, finding a good, quiet place to sit which isn't available here, there is no space available to sit and study, so we basically plan it by coming to college earlier and going to our specific location that does not have a lot of disturbance,

- Formal Peer Tutoring Program - Supportive structured modules & Flexible Self Study periods

the environment of library is very peaceful. Then we go to the library and discuss our topics, Then it's not difficult for us to manage the time because we have a 2 almost two or three self-studies daily, predetermined learning objectives, best to integrate lectures and discussions, regular feedback mechanism, structured study materials and supported support from the faculty to the tutor, that all of the batches have the self study hours in the same hour, if they want to utilize that time for peer studying or not, they should not be forced, we should have the freedom to like decide our own batch, I think the LOs of that session should be devised, I think that there should be these sessions just before the exams,

| **Sr. No** | **THEMES** | **SUB-THEMES** | | **CODES** | | **QUOTES** | | **PARTICIPANT** | |
| --- | --- | --- | --- | --- | --- | --- | --- | --- | --- |
| 1. | Motivation | Academic Benefits | | Exam-driven efficient Learning,  Concepts clarification  Mutual academic support | | - Peer tutoring helps me cover large syllabus in a shorter time.  - I along with many others won't be serious unless there is an exam.  - Concepts are more fun when you learn them with friends. | | P-6  P-26  P-11 | |
| Social & Emotional Support | | Emotional attachment Comfort level  Social support  Familiarity with peers | | - There is a more emotional attachment, and a friend can easily know about the percentage of a topic understood by her friend.  - My comfort level with friends affects my decision to join. | | P-9  P-12 | |
| 2. | Students as teachers | Learning Pace | | Fast learners  Slow learners | | - We all have different learning styles and different learning paces.  - I'm a slow learner, and sometimes I cannot go with the pace of my peers. | | P-3  P-14 | |
| Teaching Skills | | Consolidated prior knowledge  Knowledge sharing  Enhances learning | | - My peers should be knowledgeable about the subject they are teaching.  - Also deepen my grasp on this subject matter.  - As a student, it is very important for us to promote such activities because it reinforces our concepts as well | | P-7  P-25  P-22 | |
| Sr. No | THEMES | | SUB-THEMES | | CODES | | QUOTES | | PARTICIPANT |
| 3. | Hindrance to engagement | | Conflicting Timetables | | Unavailability of peers  Mismatched Schedules | | - We have conflicting schedules because we are in different batches.  - Finding a common studying time when everyone is free is difficult.  The availability of my classmates affects my decision. | | P-2  P-12  P-1 |
| Non-serious behavior | | Disruptive tools  Casual Attitude  Lack of discipline | | - Distractions like using gadgets and talking about random stuff.  - Non-serious attitude of peers makes me leave the group.  - Non-serious attitude or behavior of my peers is a challenge. | | P-2  P-7  P-13 |
| 4. | Tutor/ Tutee Selection | | Knowledge-based  Learning | | Level of comprehension  Simplified explanations  Reinforcement of concepts | | - Peers should be knowledgeable about the subject they are teaching.    - I participate when my friend, who has a better understanding, is teaching. | | P-5  P-14 |
| Amicable relationship | | Bond of Friendship  Minimal verbal barriers  Comfort in asking questions | | - My decision to join is influenced by whether my friends are in the group.  - No communication barrier between friends helps in understanding topics better. | | P-12  P-9 |

| **Sr. No** | **THEMES** | **SUB-THEMES** | **CODES** | **QUOTES** | **PARTICIPANT** |
| --- | --- | --- | --- | --- | --- |
| 5. | Learning Environment | Physical Locations | Quiet place  Weather conditions | Finding a good quiet place to sit is challenging.  During Summer it's harsh weather and we can't sit in the garden or somewhere to study | P-12  P-9 |
| Lack of resources | Limited access to Skill Lab  Availability of models  Inadequate hands-on practice | We need skill labs to practice on each other on bone studying is also easy and for them. | P-14 |
| 6. | Formal Peer Tutoring Program | Supportive Structured Modules | Training sessions  Feedback Mechanisms | I suggest training sessions and regular feedback mechanisms., structured study materials and support from faculty to the tutor. | P-10 |
| Flexible Self-Study periods | Adaptable  Casual sessions | So it should be kept for informal and only for those who like it.  - Students should have the flexibility to decide if they want to utilize that time for peer studying. | P-12  P-11 |

| **Sr. No** | **THEMES** | **SUB-THEMES** | **CODES** | **QUOTES** | **PARTICIPANT** |
| --- | --- | --- | --- | --- | --- |
| 7. | Personal Development | Non-cognitive Skill enhancement | Communication skills  Confidence to speak in public  Leadership skills as a tutor  Self- Control | I have improved my communication skills and it has also helped me to strengthen my relationship with my peers  Besides academic learning, I have developed patience, teamwork, communication skills | P-25  P-24 |
| Cognitive Skills | Memory retention  Active Learning  Problem-solving skills | It encourages active learning, and it pro  motes discussion amongst peers.  Teaching there enhances my knowledge and helps me retain already learned stuff in a better way. | P-22  P-26 |
| 8. | Organization of Sessions | Initial Preparation | Pre-planned session  Time management  Aligning with personal study schedules | I like planning my sessions beforehand... we plan it ahead like maybe in the breaks or the free time. | P-23 |
| Spontaneous sessions | Random gathering  Need-based sessions | We don't usually arrange the sessions. Whoever is studying a hard topic we just come together and study it.  For me it's just a spontaneous and need-based process rather than a pre-planned one. | P-25  P-24 |

| CATEGORIES FROM FGD QUESTIONS | | | |
| --- | --- | --- | --- |
| Arrangement of Informal Peer Tutoring Process | Benefits | Challenges | Expected Institutional support |
| 1. Tutor/ Tutee Selection 2. Organization of the Sessions | 1. Motivation 2. Personal Development | 1. Hindrance to engagement 2. Students as Teachers | 1. Learning Environment 2. Formal Peer Tutoring Program |
