# Supplementary material for: Exploring Factors Affecting Informal Peer Tutoring Process Among Pre-Clinical Medical Students of a Private Medical College
Source: Research Square preprint supplement (doi:10.21203/rs.3.rs-5537207/v1), 2025-05-02
Supplement: Supplementary file 10 [file fadf067f766ea109f1f57a65.docx]

**FOCUS GROUP DISCUSSION – 1**

**Pre-clinical medical students - 2nd year MBBS**

**08 participants**

**12th June 2024**

# Audio file

Voice 001 2.m4a

# Transcript

**Researcher:**

**Everyone. So can you describe your typical day in a preclinical year of a medical program?**

Speaker 1:

Basically, I wake up at 4:45 o'clock. Then I offered my prayer, then I for some time about 10 10 minutes I'd start the Quran and then I have some breakfast and I am going to ready. At the college I at the college at about 8:00, then sometime we have self study and the lectures. If we have lectures then I attend my lecture, make some notes and at about 9:50 we have 10 minutes break. Then we go to the cafeteria for some refreshments and after 10:00 sometime we have our STD's labs and sometime we have our self studies if we have. Self study, we. Go to the library and then we decide to discuss our the previous remaining topics. Then we divide the. That topic in five or six, then at I am then at about at 3:00. I I am free from the college. I reached the home at about 4:00 and then I have my meal and then I'm going to take the rest and.

**Researcher:**

**How about you, ma'am? How do you? Spend your typical day at college.**

Speaker

Ma’am. Can you stop?

Speaker 3:

OK, so my name is Alina Altaf and I am second year MBA student. If it comes to my routine, normally I wake up at 6:30 AM and then I get ready for the college. I reach the college around 8:00 and then I attend to the lectures and after that we get a refreshment. Break at 9:50 AM after that. Sometimes they are skill labs, sometimes they are self studies in the self study we prefer to study together and at 3:00 we get off from the college. We reach home and then I take rest and between 8:00 to 10:00 I spend some time with my family. And by 11:00 I get to bed that. Is my routine.

# Audio file

Voice 002.m4a

# Transcript

Speaker 4:

OK, I will go by 6 and have my breakfast and then get ready for the college. Each college around 8:00. Then like we have lectures. So I attend my lectures, make notes after that, like we have refreshments and we have either STD's or skill labs. Depending on our schedule. In the self studies, we mostly discuss our previous topics and we finished college at 3 reach home by 4:00 and after that like after having some meal I take some rest, go for the walk and then as well I study about for two hours daily. I try my best and then I spend spend time with my fan and at last. I go to bed at an hour.

# Audio file

Voice 003.m4a

# Transcript

Researcher

OK.

Speaker 5

So I wake up at about 6:00 AM and then I have to do some work. If I have and get ready for the college and I reach the college at about 10:00 AM and I take the lectures according to the daily schedule and then at about 9:50 we have 10 minutes break, we go to the cafe. Have some refreshments and it depends on the schedule that we have skill labs, SDS and PBLS. Rather what it is. So if we have. Yesterday we spent some time with each other and discussed the previous topics. If we have and about three, we are free from the college and about 330I reached home and take some meal, have some rest at about 6:00. I study some college work. And spent some time with my family and I got to the bed up at about 10:00 PM.

# Audio file

Voice 004.m4a

# Transcript

Speaker 6

When I come so my basically routine is very simple. I wake up at 7, get ready for the college about like 7:30, go to college, like at 8. I reached college at 8:00 and then take some classes. There's a break and spend time with my friends. Then if we have self studies then twice a week. Twice a week we used to, or we compel ourselves that we have to group study. So we studied and then at 3:00 we will free. I'll be home at like 4. I take a nap again, we go back 8 (laughter) and that's it.

Researcher

That's good. That's good. OK.

# Audio file

Voice 005.m4a

# Transcript

Speaker 7

Assalamualaikum, I wake up at 4:20 or 4:30 I offer my further prayers and read the Quran and then I carry on to my workout. I workout for about an hour an hour or like an hour and a. Half. Then I get ready for college and I reach college at about 7:40. I have my coffee before my first lecture and. Then I continue with my daily timetable. If I have any free classes or sit down with my friend and discuss what we need to study at home and like some other project. So. And basically what I need to do after college now and then I reach home at about four. I take a nap and then I have lunch, then I offer myself prayer and. After that, I practice my hobbies and this and then I could just go to sleep after 9.

# Audio file

Voice 006.m4a

# Transcript

Speaker 8:

I usually wake up around four offer my prayers, go back to sleep, wake up at around like 645, get ready for college, which college around like 750. I take my classes if I usually have a free period, I just hang out with my friends, after which I go. Home around 330 340 I eat my lunch often my prayers go to sleep, wake up around six, do exercise if I have some work for that day. I completed during that time and then I go around, go to sleep around 12.

# Audio file

Voice 007.m4a

# Transcript

Speaker

Next is.

Speaker 1

The.

Speaker 8

Umm…A student's role in teaching is important in the sense that a student can teach another student better than a teacher can because they are on the same wavelength, so he knows how to, and especially if you teaching your friends you know how to, you know, better how to teach your friend and it saves your friend a lot of time because instead of taking an entire lecture watching a video or reading the book, you can just. Getting through that topic much faster, much easier than any other teacher can.

Speaker 1

Help me learn better and support my fellows.

Speaker 3

OK, so as. As a student like you should be in like asking questions, learning and being engaged and motivated. And as a teacher like you should share what you know and like. Try to help your peers and that's it. whispers….

Speaker 2

So as a student, I think it's about your learning skills. Taking the teacher the lecture very attentively and make some notes and as a teacher I think it's better that you can. You can give the other person a better understanding at his/ her level.

Speaker 6

As a student, I guess the most important responsibility is having a good learn listening skills. If you listen to a teacher like with full year. Then I guess we grab all the points and if some point is left, then what's peer tutoring for? So we gather around, discuss some topics, some topic, because in a friendly environment in a group study, the most important topic of having like a group study is that we can discuss the topics in a way more friendly manner. Because the relation between your teacher and us is way more formal as compared to your relation with your friends. So I guess as a teacher you have to be in a confident mode. You have to be have a good communication skills, but in a student mode listening skills matters the most.

Speaker 7

I believe that student must participate actively in the teaching process. The student must ask questions regarding the topic and they should keep the learning process as interactive as possible, because only then the teacher can give their most to the student.

# Audio file

Voice 008.m4a

# Transcript

Researcher:

So how do you plan and execute the peer tutoring process?

Speaker 1

Basically, to kick off the pure peer tutoring, you can start by reaching out to the classmates who might need help, or by offering your assistance. I think that it's a collaborative process. You can switch over to your roles depending upon the someones. Strength and weakness.

Researcher:

So do are you a tutor or a tutee in a group?

Speaker 1

Group. Basically, I am a tutor (laugh)

Researcher:

Tutor you're a tutor in a group. OK, so mostly you teach.

Speaker 2

After getting into medical school, I realized that the content is so vast and I was so stressed out and I can't figure out how to cover it, so I luckily got a group of friends so very like I can take P1, P1 like ask that she can teach us. So we learned from her and she has good concepts, so it make easy and she has a good strength in like she is a stronger in anatomy so she has good concepts.

Speaker 3

At first, when I joined at school. Everything was completely new for me, like the new people, new environment and I didn't know how to study which books I should buy toO. But later on, slowly and gradually, when I got to know about the things, there was so much syllabus that was already covered up. So I didn't know how to cover it at that time. I met P1 and she helped me in that process (background laughter) And also are mentors they also encourage the peer tutoring and that is why I just jumped into it. For me its aaa…I think that my peers should be knowledgeable about the subject that they're teaching

Researcher:

You are the tutee also.

Speaker 3

I'm the tutee also, OK.

Speaker 4

OK, so as ma'am is asking again and again, you are a tutee or a tutor. It depends like my strength and weaknesses on the subject, like in some subjects like like in anatomy, I can like take help from my friend P1 (laughter) and in physio and I this can be helpful from my moellium slides ( laughter with background mumble) Yeah, I'm both and that's it.

Speaker 5

Basically, in my school I when I came in the Med school, I know about the peer tutoring, but I haven't done this far. But then I met my friends. I knew that the peer tutoring is very beneficial and I'm mentoring teachers also pressurize that. It has a lot of benefits and you should do this. So we decided and I think it gave us a lot of benefits and I am a tutor and tutor. Also both.

Speaker 6

So as I got into the Medical College, I was very I was so exhausted, I was too exhausted. So when I got into it, or seniors or mentoring, we we all are in the same batch. So our mentor mentoring classes, teachers always compelled us to do the group study. So we decided like. Why don't we give it a try? So first of all, we think that it will never work for us. So because it was the first time, I guess two or three years have the that experience, but it was my first time and hers too. So we thought that like it will never work for us, but we give it a chance and when we give it a chance, we were like, yeah, it's very good for us like we can do it. So group study proves very, very. Efficient for Lakers and yeah, it helped me a lot, helped me a lot.

# Audio file

[Voice 009.m4a](https://onedrive.live.com?cid=c177b401a2934353&id=C177B401A2934353!s43b7edab5e2e430988b721fc64c85609)

# [Transcript](https://onedrive.live.com?cid=c177b401a2934353&id=C177B401A2934353!s43b7edab5e2e430988b721fc64c85609)

[Speaker 7](https://onedrive.live.com?cid=c177b401a2934353&id=C177B401A2934353!s43b7edab5e2e430988b721fc64c85609)

[I've personally always been involved in these peer tutoring things since like my secondary school, and so this was just natural to me to continue it in my school too. And the planning of the tutoring process is something like our group of friends we just discussed, which topic is whose strength, who knows what topic the best. And then we divide these topics on each other to present them in our group so that we can just cover each topic in. In an efficient manner.](https://onedrive.live.com?cid=c177b401a2934353&id=C177B401A2934353!s43b7edab5e2e430988b721fc64c85609)

# Audio file

Voice 010.m4a

# Transcript

Speaker 8

I've been doing group studies with my friends since second year and the reason we've been doing it is because the same reason, like some person knows more subjects. Some person, just like studies more in general like what we usually do is like we go to each other's houses, we divide up the topics between ourselves and we all are. Duties and the tutors, we just do the topics and we all just teach the.

Researcher:

How do you get started with peer tutoring? Like how do you decide who is going to be in the group? What time is feasible for it? How do you arrange your [aa…] these sessions? Manage your time with the vast content? How do you?

Speaker 1

Do this basically when enjoying the Medical College I am so stressed that I cannot understand how I will study and how I can do it? Basically, I'm so exhausted then I like that we have to study in Group because our mentors also guide us and our seniors also as does that to get get your concept better if you study in a group then I luckily I also get [aa…. laughter]Good friends and our batch is also same. Then it's not difficult for us to manage the time because we have a 2 almost two or three self-studies daily and we also have a library, the environment of library is very peaceful. Then we go to the library and discuss our topics.

Speaker 2

To start [aa..]with the peer tutoring, you can [aa..] like offer help to your [aa..] group member, offer your help, or [aa..] by asking your assistant in any subject. Or like we can [aa..] manage our time and [aa..]we can, like, arrange informal [aa..] meetups in self-studies, we have daily like two to three self-studies. So we can easily [aa..] discuss our topics and and we [aa..] take [aa..] roles based on like. Who is like stronger in which subject and who needs their help so.

Speaker 3

So in the first year was really easy to execute our plan because luckily we all had the same batch. But in the second year, it's a bit tough now because we are we all are dispersed now. We are different in different batches. So we have to plan about where we have to study which time we have to so [aa..] sometimes we usually on a voice call, Group call, we study together and that's it.

Speaker 4

She said now we are scattered. So ہم لوگ یہی کرتے ہیں [Urdu: this is what we do][laughter] so we do like [laughter] and like some like.

# Audio file

Voice 011.m4a

# Transcript

Speaker 5

So as last year, we are in the same batch and there is no difficulty in arranging our meetups of the peer tutoring, but now we are in different batches. So we decided according to our daily schedule, if we have such studies all together, then we decided to cover our previous topic and we divided into subtopics. And then we [aa..]do our study.

Speaker 6

As my concept about peer tutoring is same as my whole group said, like [aa..] when [aa..] it started with the first year we were in the same batch [aa..] but in second year we got different got in different batches. So basic the thing that depends on our group study is basically our daily timetable. If daily timetable have cells then we go for it. But then I will think like what technology is for like we can group chat, we group call, voice call, video calls and that's the thing that helps us a lot. Like if we are continuing this peer tutoring, then technology is a major [laughter] key over here.

Speaker 7

So we just discussed the timings and the setting of the group study session in our WhatsApp groups [aa..] And then we basically jus [...] look through our schedules and just decide where we have to do the thing and how we have to do the thing.

Speaker 8

We basically what we do is first we have to check like, who's free [aa..] what time is even free at what will availabilities do they have because like, sometimes we can arrange zoom meetings. But like 2-3 people will have really bad Wi-Fi so they can't usually join. We could sometimes also arrange it at each others homes, but then there's the issue of some people can't actually travel that far so that actually plays some bit of a problem, but more or less we can usually do meetups, at least even if we don't do it daily, we can do it weekly or something like, and then we just divide the topics and we're like you can study this way.

# Audio file

[Voice 012.m4a](https://onedrive.live.com?cid=c177b401a2934353&id=C177B401A2934353!s9b490d00be304781b5002cc57b9eb57e)

# [Transcript](https://onedrive.live.com?cid=c177b401a2934353&id=C177B401A2934353!s9b490d00be304781b5002cc57b9eb57e)

[Researcher](https://onedrive.live.com?cid=c177b401a2934353&id=C177B401A2934353!s9b490d00be304781b5002cc57b9eb57e)

[What factors affect your decision to join and participate in a group of peer tutoring?](https://onedrive.live.com?cid=c177b401a2934353&id=C177B401A2934353!s9b490d00be304781b5002cc57b9eb57e)

[Speaker 1](https://onedrive.live.com?cid=c177b401a2934353&id=C177B401A2934353!s9b490d00be304781b5002cc57b9eb57e)

[I think that the most important factor is your interaction and cooperation with your fellows and classmates, and you also have to know that in which subject you need the help of your fellows and classmate.](https://onedrive.live.com?cid=c177b401a2934353&id=C177B401A2934353!s9b490d00be304781b5002cc57b9eb57e)

[Speaker 2](https://onedrive.live.com?cid=c177b401a2934353&id=C177B401A2934353!s9b490d00be304781b5002cc57b9eb57e)

[Factors that like affect to join the peer tutoring is that the which in which subject I need help [aa..] like availability of my fellow Members to study with and the willingness of both tutor and tutee [aa..] while in a tutoring process and social relationships and interactions[aa..] also help you in better selection of your[aa..] peer tutors [aa..] because[aa..] to carry on like effective sessions and](https://onedrive.live.com?cid=c177b401a2934353&id=C177B401A2934353!s9b490d00be304781b5002cc57b9eb57e)

[interviewer](https://onedrive.live.com?cid=c177b401a2934353&id=C177B401A2934353!s9b490d00be304781b5002cc57b9eb57e)

[So you you're more comfortable with your friends?](https://onedrive.live.com?cid=c177b401a2934353&id=C177B401A2934353!s9b490d00be304781b5002cc57b9eb57e)

[Speaker 2](https://onedrive.live.com?cid=c177b401a2934353&id=C177B401A2934353!s9b490d00be304781b5002cc57b9eb57e)

[Friends yeah because it's enjoyable and effective as well.](https://onedrive.live.com?cid=c177b401a2934353&id=C177B401A2934353!s9b490d00be304781b5002cc57b9eb57e)

[Speaker 3](https://onedrive.live.com?cid=c177b401a2934353&id=C177B401A2934353!s9b490d00be304781b5002cc57b9eb57e)

[For me the factor is if there is any formative or assessment coming up that really compels me to indulge into the peer twittering and also with friends. There is a really friendly environment and we create [aa..] productive atmosphere which also helps us to study together.](https://onedrive.live.com?cid=c177b401a2934353&id=C177B401A2934353!s9b490d00be304781b5002cc57b9eb57e)

[Speaker 4](https://onedrive.live.com?cid=c177b401a2934353&id=C177B401A2934353!s9b490d00be304781b5002cc57b9eb57e)

[So at start when I used to study physio, the slides were so long that it took me so much hours [aa..] Then I decided to quit. But my friend P1 [laughter] she just came like an Angel in my life [laughter] She just make the bullet points for me. She make notes for me and الحمداللہ [Urdu: Praise be to God] By her efforts, now I can study Physio easily and it's more effective.](https://onedrive.live.com?cid=c177b401a2934353&id=C177B401A2934353!s9b490d00be304781b5002cc57b9eb57e)

[Speaker 5](https://onedrive.live.com?cid=c177b401a2934353&id=C177B401A2934353!s9b490d00be304781b5002cc57b9eb57e)

[So[aa..] it's beneficial because I have a lot of content in the Med school. When I came so in the peer tutoring, the factors that affect me to join is that better understanding and the making my concepts very clear and strong.](https://onedrive.live.com?cid=c177b401a2934353&id=C177B401A2934353!s9b490d00be304781b5002cc57b9eb57e)

[Interviewer](https://onedrive.live.com?cid=c177b401a2934353&id=C177B401A2934353!s9b490d00be304781b5002cc57b9eb57e)

[You find it very convenient with your friends.](https://onedrive.live.com?cid=c177b401a2934353&id=C177B401A2934353!s9b490d00be304781b5002cc57b9eb57e)

[Speaker 5](https://onedrive.live.com?cid=c177b401a2934353&id=C177B401A2934353!s9b490d00be304781b5002cc57b9eb57e)

[Yes, ma'am, because the environment is very friendly. So it helps me to study better and clear concepts.](https://onedrive.live.com?cid=c177b401a2934353&id=C177B401A2934353!s9b490d00be304781b5002cc57b9eb57e)

[Speaker 6](https://onedrive.live.com?cid=c177b401a2934353&id=C177B401A2934353!s9b490d00be304781b5002cc57b9eb57e)

[The factors that affect my decision to join and participate in a group for peer tutoring is that my friends know me very well. They know when which points I'm good and which points I need help and and they know how to like. They know me personally so they know how I can [aa..] compell myself to study harder. And this was a major decision that I [aa..] participated in the group. And yeah [aa..] when I, like, came into the med school. So the the syllabus was very vast. And I was like, I can’t do this. And I used to, like, skip lectures I use. To like never compare myself to do the stuff that I like taught daily. So that's why, like whenever like P2 said, whenever like there is a formative or ospe, Isha helped me a lot when making the bullet points like I can do the whole physio, the four or five chapters that like I used to be done in five hours. In just one hour and that helped me a lot.](https://onedrive.live.com?cid=c177b401a2934353&id=C177B401A2934353!s9b490d00be304781b5002cc57b9eb57e)

# Audio file

Voice 013.m4a

# Transcript

Speaker 7

[aa..]First of all, I think that my peers should be knowledgeable about the subject that they're teaching, and even when I'm acting as a tutor, I always ask my peers to at least look at the subject in the books to at least have some background knowledge and to know if if that's they're saying something wrong because it just says something wrong. Then it's like counterproductive, and it's not any effective in any way, so.

Speaker 8

One of the biggest factors for me would be motivation. Like a lot of the times, you can't actually will will hear yourself to study anytime you want to. But if you are studying in a group study and like somebody has given you an assignment, they've given you a topic. So that actually forces you to do your topic within the given time because otherwise you're just. Then let everyone else down. So Motivation. Yes, it's very big factor. And second of all, it's like[aa..] This time the time it takes like some people have long, longer attention span. Some people have short attention span, like if one person say he can watch like the three hours of Doctor Najeeb videos, the other person watches like 2 minute YouTube videos. Now they both watch their own content and then they both can discuss it and then can just the same contents can take a single person like 5 hours together they can do it In like 2 to three hours.

# Audio file

Voice 014.m4a

# Transcript

Interviewer

What factors affect your decision to leave a group for peer tutoring?

Speaker 1

[aa..] I think that the most important factor which affect my decision to leave the group is the availability of the my classmates, as in the first year we have the same batch, but in the second year our batches are different. Sometimes my fellows are not available and the other factors are the mismatched learning, lack of progress interruptions. Then I decided to prioritize the my study on my own

Speaker 2

Factors such as like conflict, we have conflicting schedules because we in second year we are in different batches. [aa..] This is the major factor to leave [aa..] for peer tutoring and other is like distraction [aa..] while doing peer tutoring is like use one of the fellows using gadget and one of start like talking about random stuff and these are.

Speaker 3

OK, the first and foremost factor for me that induces me to leave the group is we all have different learning styles and we all have different learning pace as well. Someone is a fast learner and some people are slow learners like me. So that really compels me to to leave the group.

Speaker 4

As P3 said, I'm also a slow learner, so it's like sometimes I decide to leave the group and secondly we are friends for about 1 1/2 year and we also have a meetups in our homes. So at that time other than studying, we more do chitchatting, ordering food ordering, snacks and just like مستی مزاق [urdu: funny joke] enjoyable factors. So I think so these factors like sometimes it's not worth it when you are in the group study. But of course when you have when you have a exam tomorrow you you have to be serious. So at that time but mostly that I don't like group study at the day before the exam.

Speaker 5

And so for me, the factor that affect my decision to leave a group is that the fluctuation between our daily timetables as we have self studies in different times. So that's the main problem.

Speaker 6

So the factors that affect my decision to leave a group for peer tutoring is basically as all as everybody told that time, basically a timetable. Now we are in different batches, time matters a lot. And second of all, the lack of progress. I'm a very slow learner. So they are very fast I guess. If they're saying slow that they're lying, coz, I'm the slowest 1, so I need more. Like, if there is one topic, I need 2 hours to study it. But that time and learning style and yeah, timetables play an important role in it. Yeah, that's pretty much.[laughter] but yeah overall, I think that the most important factor which affect my decision to leave the group is the availability of my classmates

# Audio file

Voice 015.m4a

# Transcript

Speaker 7

For me it's the non-serious attitude of my peers because of course, if they're not standing by themselves, how will they teach me? So that really is a mood killer. And that makes me leave the group.

Speaker 8

For me its availability and dependency. Dependency can be bad in the sense that if you're only studying in Group studies and you're only doing covering your topics when someone else is telling you to, there is a good chance once your group actually finally dissolves, you're not going to study yourself. So that is slightly concerning factor. Availability is also problem sometimes, like you're gonna be free at home. You're gonna study, and your friend has to go to like family dinner or something like that. So like you had your plan at 8:00, but he had to leave. And now the plan dissolves. There's also the fact that, like, some people study better in the daytime, some people study better at the night time. It's just completely dependent on you. So, like, it's a good chance to both can be studying at night time, but one of you. Is just like out of it.[laughter]

# Audio file

Voice 016.m4a

# Transcript

Interviewer

OK, besides academic learning, what additional advantages have you obtained as a tutor or tutor through these sessions?

Speaker 1

Besides the academic learning, I think that we have additional benefits from the peer tutoring. As a tutor, you can improve your communication skills, leadership skills as a tutee, you can you can make easily understand your concepts from your peers because.

Speaker 2

As a as a tutor, you can like improve your communication skills, leadership skills and you can easily explain the complex topics and boost your confidence. And as a tutee you can[aa..] like[aa..] have a [] Comprehend your like understanding maybe. Yeah, listening skills and. Maybe they're.

Speaker 3

As a tutor, it can really enhance your communication skills and it also deepens your own understanding by teaching it and as a tutee you can get a good comprehension and you can also learn in a very less time by your other peer. That's it

Speaker 4

Same as everyone said that being a tutee, you get like confidence. To speak in front of the audience and being a tutor like you develop the critical thinking and you go deeper in the thoughts and it may help you in like arising.

# Audio file

Voice 017.m4a

# Transcript

Speaker 5

I think as a tutor, the main benefit is that I have built my confidence and good communication skills or as a tutee I have developed the patience to listen other person [laughter]because it's I have not that before.

Speaker 6

As a tutor you develop the habit of a good communication skills. A confidence level boost to the top. And one more thing, like if you're good at one subject or one topic and you're teaching that topic to your fellows, then you will know that which part I need to grab my more knowledge about and as a tutee you develop a habit of listening as a these a tool and yeah, the syllabus. Average less time like you can do a lot of work.

Speaker 7

For me, peer learning saves me some time so that so I can indulge in some other hobbies and make time for myself and in a peer learning environment there is a social connection and strengthening all social bond and I get to understand my friends but and understand myself better and work on the things that I like as a listener or as a speaker.

Speaker 8

As they've all mentioned before, the basic things you could get from them is for as a tutee. You could get better attention span, better listening and as a tutor you can get better communication skills which helps in the future in the aspect of like if you're a doctor and you have a team under you, so you're going to do a better job at controlling them if you have like practice.

# Audio file

Voice 018.m4a

# Transcript

Interviewer

What challenges have you faced as a tutor or tutor during your sessions?

Speaker 1

I think that the challenges we face is coordinating our schedules, different learning styles, and you must have to ensure that your your fellows must stay focused what you say.

Interviewer

You're a tutor. How do you keep them engaged with you?

Speaker 1

[aa..] By developing the interest and making easy for them so that they.

Speaker 2

Challenges are that we have to, like [aa..] coordinate our schedules different everyone has a different schedule and [aa..] every everyone stay should stay focused because there are like many[aa..] interpersonal issues arise within a group members. And that’s it.

Speaker 3

For me, the biggest challenge is that Non-serious. Sorry, ma'am. Can I take it?

# Audio file

Voice 019.m4a

# Transcript

Speaker 3

For me, the biggest challenge you face is that non-serious attitude of your peers, because we commonly we talk about random things and we just get distracted very easily. So that's it.

Speaker 4

As a tutor, you have to ensure that everyone remains focused and as a tutee like you have to develop a patience level to listen and they are your friends.

Speaker 5

I think as a tutor you have to focus on the weaknesses of your tutees as they are weak, at which point and as a tutee you have to develop your listening skills.

Speaker 6

As a tutee, first of all, I'm the tutee. So that's I'm first I'm going to talk about the duty stuff as a duty. If you're not having any kind of progress, then it's OK to be selfish in leaving the peer tutoring. If you're not because you're for most thing here to like, is to study. And if you're not having any progress, then. You can leave it. And as a tutor, the challenges must be like, as you all know, study is boring. So we have to develop a sense of entertainment, I guess in kind of teaching others, and as we all our friends, so we know the mentality of each other. So that's why it helps [laughter] us a lot.

Speaker 7

[aa..] As a tutor, I feel it. I feel a challenge to adapt to someone else's capability, right to make sure that each and every friend of yours in that group understands what you're saying. And because they have a different level of capability. So we have to adapt to them and. We have to make our own comprehensive comprehensibility, better for them, and I have not really faced any challenges as a tutee.

Speaker 8

[aa..]My challenges faced as a tutee were more or less the same thing like sometimes a friend is saying something will go too fast. I won't understand it, but even if they go slow I the topic is too complex for me to get it at that point. So I have to give give it more time by myself. And as a tutor, it's like sometimes you can try your best to explain something to someone, but they just won't get it. Because like I said, everyone has their own way of learning things, so maybe it's something complex. Maybe it's maybe something too long. Whatever it is, they can't keep up with you on that topic and they want to actually understand the topic until like I said, as me you have to do it yourself at that point. So that is slightly troubling.

# Audio file

Voice 020.m4a

# Transcript

Interviewer

What will you suggest to module using peer tutoring?

Speaker 1

Yes, I will suggest some module like in the first year we have a CVS module in which we have a lot of skill labs and the models and the skill labs like apex beat we have. We need a model in which we perform and so that we easily understand and for to understand. Each and everything of the models we can easily understand if we discuss that model in the group.

Interviewer

So how do you how do you want to make that model? But the framework? How would you want to make a framework of the peer tutor? Model do you want a predetermined learning objectives or you would want to decide the content? On your own.

Speaker 1

Predetermined learning objectives

Speaker 3

So I will suggest CNS and ANS because it was such a lengthy module as there was so much salki Gara and all that. So and the method that I will suggest is first of all, I'll ask everyone to organize study material, the models and secondly we make pneumonic about there's a lot of stuff, so we try to make nemonics like so. That's it.

# Audio file

[Voice 021.m4a](https://onedrive.live.com?cid=c177b401a2934353&id=C177B401A2934353!see84d8f2e4094ff3817e9563e21c8edc)

# [Transcript](https://onedrive.live.com?cid=c177b401a2934353&id=C177B401A2934353!see84d8f2e4094ff3817e9563e21c8edc)

[Speaker 4](https://onedrive.live.com?cid=c177b401a2934353&id=C177B401A2934353!see84d8f2e4094ff3817e9563e21c8edc)

[So I will not suggest any module.](https://onedrive.live.com?cid=c177b401a2934353&id=C177B401A2934353!see84d8f2e4094ff3817e9563e21c8edc)

[Speaker 6](https://onedrive.live.com?cid=c177b401a2934353&id=C177B401A2934353!see84d8f2e4094ff3817e9563e21c8edc)

[Yeah, as P1 told the module CVS. It was very hard, I guess. And I was also absent in that module. So peer tutoring helped me a lot in this because it was all about skill labs. It's all all about models. So the peer tutoring help boost the level of knowledge in me. And if yes, then suggest the possibilities outline or the framework using the peer tutoring. [aa..] Basically the possibilities is [aa..] As p3 told quite spot, I guess because distractions make your situation worse, I guess so quite spot and yeah availability of the models because in our college I guess if in MS like we face a lot of difficulties in issuing the models and that so I guess. It will be way more easy if like we can get the models easily. And yeah a quiet spot.](https://onedrive.live.com?cid=c177b401a2934353&id=C177B401A2934353!see84d8f2e4094ff3817e9563e21c8edc)

[Speaker 7](https://onedrive.live.com?cid=c177b401a2934353&id=C177B401A2934353!see84d8f2e4094ff3817e9563e21c8edc)

[I will not suggest a model based on based solely on peer tutoring models, because peer tutoring is only a supplement to your learning process and you do need the help of experienced teachers to understand the concept better and to really grasp the thing. So it's always best to integrate lectures and discussions with experienced teachers and also then integrate this peer tutoring model and only then it will be efficient.](https://onedrive.live.com?cid=c177b401a2934353&id=C177B401A2934353!see84d8f2e4094ff3817e9563e21c8edc)

[Speaker 8](https://onedrive.live.com?cid=c177b401a2934353&id=C177B401A2934353!see84d8f2e4094ff3817e9563e21c8edc)

[I would suggest the neuroCNS module because [aa..]if the module has too many things to memorize, like if it's a slow, solely gross anatomy or biochemistry, that type of thing doesn't go well in peer tutoring. Mostly because but like رتا لگانا پڑتا ہے [Urdu: it’s cramming]for neuro and for CNS, it's like. All. It's like all neuroanatomy and it's all physio, all the things that are based on solely on concept, conceptual things are much easier to study in peers processes because you're just going to explain something to them if they understand it, then it's all well they don't actually have to, like, memorize it later on. And the easiest way to like is like like they said before, one of the problems for college is like you can't get models. It's like a good chance that you arrange you arranged everything perfectly. But we only have like one model and like someone else already has issued.](https://onedrive.live.com?cid=c177b401a2934353&id=C177B401A2934353!see84d8f2e4094ff3817e9563e21c8edc)
